# Supplementary material for: Characterizing Forest Cover and Landscape Pattern Using Multi-Source Remote Sensing Data with Ensemble Learning
Source: MDPI journal article supplement (doi:10.3390/rs14215470), 2022-10-30
Supplement: s1 [file s1]

Table S1 List of Sentinel-2 images used in this study.

| Image ID                               | Date     |
|----------------------------------------|----------|
| 20210104T035139_20210104T035140_T48STF | 20210104 |
| 20210104T035139_20210104T035140_T48SUF | 20210104 |
| 20210112T040131_20210112T040127_T48SUF | 20210112 |
| 20210114T035119_20210114T035115_T48SUF | 20210114 |
| 20210119T035101_20210119T035334_T48STF | 20210119 |
| 20210119T035101_20210119T035334_T48SUF | 20210119 |
| 20210119T035101_20210119T035334_T48SUG | 20210119 |
| 20210122T040051_20210122T040051_T47SQA | 20210122 |
| 20210122T040051_20210122T040051_T47SQC | 20210122 |
| 20210122T040051_20210122T040051_T48STF | 20210122 |
| 20210122T040051_20210122T040051_T48STH | 20210122 |
| 20210122T040051_20210122T040051_T48SUF | 20210122 |
| 20210122T040051_20210122T040051_T48SUG | 20210122 |
| 20210125T041041_20210125T041041_T47SPD | 20210125 |
| 20210126T043049_20210126T043511_T47TKE | 20210126 |
| 20210126T043049_20210126T043511_T47TLE | 20210126 |
| 20210127T040029_20210127T040026_T48STH | 20210127 |
| 20210127T040029_20210127T040026_T48SUG | 20210127 |
| 20210128T042031_20210128T042031_T47TLE | 20210128 |
| 20210128T042031_20210128T042031_T47TME | 20210128 |
| 20210131T043021_20210131T043019_T46TGK | 20210131 |
| 20210131T043021_20210131T043019_T47TKE | 20210131 |
| 20210131T043021_20210131T043019_T47TLE | 20210131 |
| 20210201T040001_20210201T040204_T48SUF | 20210201 |
| 20210203T034949_20210203T034946_T48STF | 20210203 |
| 20210203T034949_20210203T034946_T48SUF | 20210203 |
| 20210204T040951_20210204T040949_T47SPD | 20210204 |
| 20210205T042949_20210205T043012_T46TGK | 20210205 |
| 20210205T042949_20210205T043012_T47TKE | 20210205 |
| 20210205T042949_20210205T043012_T47TLE | 20210205 |
| 20210206T035939_20210206T035933_T47SQC | 20210206 |
| 20210208T034921_20210208T035557_T48STF | 20210208 |
| 20210208T034921_20210208T035557_T48SUF | 20210208 |
| 20210208T034921_20210208T035557_T48SUG | 20210208 |
| 20210209T040919_20210209T040919_T47SMC | 20210209 |
| 20210209T040919_20210209T040919_T47SNC | 20210209 |
| 20210209T040919_20210209T040919_T47SND | 20210209 |
| 20210209T040919_20210209T040919_T47SPB | 20210209 |
| 20210209T040919_20210209T040919_T47SPC | 20210209 |
| 20210209T040919_20210209T040919_T47SPD | 20210209 |
| 20210209T040919_20210209T040919_T47SQB | 20210209 |
| 20210209T040919_20210209T040919_T47SQC | 20210209 |

|                                        |          |
|----------------------------------------|----------|
| 20210211T035901_20210211T040336_T47SQA | 20210211 |
| 20210211T035901_20210211T040336_T47SQB | 20210211 |
| 20210211T035901_20210211T040336_T47SQC | 20210211 |
| 20210211T035901_20210211T040336_T48STF | 20210211 |
| 20210211T035901_20210211T040336_T48STG | 20210211 |
| 20210211T035901_20210211T040336_T48STH | 20210211 |
| 20210211T035901_20210211T040336_T48SUF | 20210211 |
| 20210211T035901_20210211T040336_T48SUG | 20210211 |
| 20210213T034849_20210213T035642_T48STF | 20210213 |
| 20210213T034849_20210213T035642_T48SUF | 20210213 |
| 20210213T034849_20210213T035642_T48SUG | 20210213 |
| 20210214T040851_20210214T040847_T47SND | 20210214 |
| 20210214T040851_20210214T040847_T47SPC | 20210214 |
| 20210214T040851_20210214T040847_T47SPD | 20210214 |
| 20210214T040851_20210214T040847_T47SQC | 20210214 |
| 20210216T035819_20210216T035821_T48SUF | 20210216 |
| 20210216T035819_20210216T035821_T48SUG | 20210216 |
| 20210217T041831_20210217T042552_T46TGK | 20210217 |
| 20210217T041831_20210217T042552_T47TKE | 20210217 |
| 20210217T041831_20210217T042552_T47TLE | 20210217 |
| 20210217T041831_20210217T042552_T47TME | 20210217 |
| 20210218T034811_20210218T035431_T48STF | 20210218 |
| 20210218T034811_20210218T035431_T48SUF | 20210218 |
| 20210218T034811_20210218T035431_T48SUG | 20210218 |
| 20210221T035801_20210221T040411_T47SQA | 20210221 |
| 20210221T035801_20210221T040411_T47SQC | 20210221 |
| 20210221T035801_20210221T040411_T48STF | 20210221 |
| 20210221T035801_20210221T040411_T48STH | 20210221 |
| 20210221T035801_20210221T040411_T48SUF | 20210221 |
| 20210221T035801_20210221T040411_T48SUG | 20210221 |
| 20210222T041759_20210222T041757_T47SMD | 20210222 |
| 20210223T034739_20210223T035556_T48STF | 20210223 |
| 20210223T034739_20210223T035556_T48SUF | 20210223 |
| 20210223T034739_20210223T035556_T48SUG | 20210223 |
| 20210224T040741_20210224T041225_T47SMD | 20210224 |
| 20210224T040741_20210224T041225_T47SND | 20210224 |
| 20210224T040741_20210224T041225_T47SPB | 20210224 |
| 20210224T040741_20210224T041225_T47SPC | 20210224 |
| 20210224T040741_20210224T041225_T47SQB | 20210224 |
| 20210224T040741_20210224T041225_T47SQC | 20210224 |
| 20210225T042739_20210225T042908_T46SFH | 20210225 |
| 20210225T042739_20210225T042908_T46SFJ | 20210225 |
| 20210225T042739_20210225T042908_T46TGK | 20210225 |
| 20210225T042739_20210225T042908_T47SLC | 20210225 |

|                                        |          |
|----------------------------------------|----------|
| 20210225T042739_20210225T042908_T47TKE | 20210225 |
| 20210225T042739_20210225T042908_T47TLE | 20210225 |
| 20210226T035719_20210226T040503_T47SQA | 20210226 |
| 20210226T035719_20210226T040503_T48STF | 20210226 |
| 20210226T035719_20210226T040503_T48STH | 20210226 |
| 20210226T035719_20210226T040503_T48SUF | 20210226 |
| 20210226T035719_20210226T040503_T48SUG | 20210226 |
| 20210302T042711_20210302T043408_T46TGK | 20210302 |
| 20210302T042711_20210302T043408_T47TKE | 20210302 |
| 20210302T042711_20210302T043408_T47TLE | 20210302 |
| 20210303T035651_20210303T035646_T47SQA | 20210303 |
| 20210303T035651_20210303T035646_T47SQC | 20210303 |
| 20210303T035651_20210303T035646_T48STF | 20210303 |
| 20210303T035651_20210303T035646_T48STH | 20210303 |
| 20210303T035651_20210303T035646_T48SUF | 20210303 |
| 20210303T035651_20210303T035646_T48SUG | 20210303 |
| 20210306T040631_20210306T041303_T47SND | 20210306 |
| 20210306T040631_20210306T041303_T47SPD | 20210306 |
| 20210306T040631_20210306T041303_T47SQC | 20210306 |
| 20210307T042709_20210307T043644_T46TGK | 20210307 |
| 20210307T042709_20210307T043644_T47TKE | 20210307 |
| 20210307T042709_20210307T043644_T47TLE | 20210307 |
| 20210308T035609_20210308T040733_T47SQA | 20210308 |
| 20210308T035609_20210308T040733_T47SQC | 20210308 |
| 20210308T035609_20210308T040733_T48STF | 20210308 |
| 20210308T035609_20210308T040733_T48STH | 20210308 |
| 20210308T035609_20210308T040733_T48SUF | 20210308 |
| 20210308T035609_20210308T040733_T48SUG | 20210308 |
| 20210309T041611_20210309T042536_T46TGK | 20210309 |
| 20210309T041611_20210309T042536_T47SND | 20210309 |
| 20210309T041611_20210309T042536_T47TKE | 20210309 |
| 20210309T041611_20210309T042536_T47TLE | 20210309 |
| 20210311T040559_20210311T040611_T47SPD | 20210311 |
| 20210313T035541_20210313T035742_T47SQA | 20210313 |
| 20210313T035541_20210313T035742_T48STF | 20210313 |
| 20210313T035541_20210313T035742_T48SUF | 20210313 |
| 20210315T034539_20210315T035627_T48STF | 20210315 |
| 20210315T034539_20210315T035627_T48SUF | 20210315 |
| 20210326T040541_20210326T040828_T47SPC | 20210326 |
| 20210326T040541_20210326T040828_T47SQB | 20210326 |
| 20210326T040541_20210326T040828_T47SQC | 20210326 |
| 20210405T040541_20210405T041210_T47SPB | 20210405 |
| 20210405T040541_20210405T041210_T47SPC | 20210405 |
| 20210405T040541_20210405T041210_T47SQC | 20210405 |

|                                        |          |
|----------------------------------------|----------|
| 20210406T042659_20210406T042701_T46TGK | 20210406 |
| 20210406T042659_20210406T042701_T47TKE | 20210406 |
| 20210406T042659_20210406T042701_T47TLE | 20210406 |
| 20210407T035539_20210407T040453_T47SPC | 20210407 |
| 20210407T035539_20210407T040453_T47SQC | 20210407 |
| 20210407T035539_20210407T040453_T48STG | 20210407 |
| 20210407T035539_20210407T040453_T48STH | 20210407 |
| 20210407T035539_20210407T040453_T48SUG | 20210407 |
| 20210412T035531_20210412T035748_T47SPB | 20210412 |
| 20210412T035531_20210412T035748_T47SPC | 20210412 |
| 20210412T035531_20210412T035748_T47SQB | 20210412 |
| 20210412T035531_20210412T035748_T48STG | 20210412 |
| 20210412T035531_20210412T035748_T48SUG | 20210412 |
| 20210413T041549_20210413T042710_T47TLE | 20210413 |
| 20210414T034529_20210414T035522_T48STF | 20210414 |
| 20210414T034529_20210414T035522_T48SUG | 20210414 |
| 20210415T040541_20210415T041210_T47SND | 20210415 |
| 20210415T040541_20210415T041210_T47SPD | 20210415 |
| 20210415T040541_20210415T041210_T47SQC | 20210415 |
| 20210421T042701_20210421T043401_T46SFH | 20210421 |
| 20210421T042701_20210421T043401_T46SFJ | 20210421 |
| 20210425T040541_20210425T040913_T47SND | 20210425 |
| 20210426T042659_20210426T043020_T47SLC | 20210426 |
| 20210429T034531_20210429T035111_T48STF | 20210429 |
| 20210429T034531_20210429T035111_T48SUF | 20210429 |
| 20210429T034531_20210429T035111_T48SUG | 20210429 |
| 20210430T040539_20210430T040608_T47SND | 20210430 |
| 20210430T040539_20210430T040608_T47SPB | 20210430 |
| 20210430T040539_20210430T040608_T47SPC | 20210430 |
| 20210430T040539_20210430T040608_T47SPD | 20210430 |
| 20210430T040539_20210430T040608_T47SQB | 20210430 |
| 20210430T040539_20210430T040608_T47SQC | 20210430 |
| 20210503T041549_20210503T041838_T47SND | 20210503 |
| 20210503T041549_20210503T041838_T47TME | 20210503 |
| 20210504T034529_20210504T035610_T48SUF | 20210504 |
| 20210504T034529_20210504T035610_T48SUG | 20210504 |
| 20210505T040541_20210505T041215_T47SPC | 20210505 |
| 20210505T040541_20210505T041215_T47SQB | 20210505 |
| 20210505T040541_20210505T041215_T47SQC | 20210505 |
| 20210507T035539_20210507T040616_T47SPB | 20210507 |
| 20210507T035539_20210507T040616_T47SPC | 20210507 |
| 20210507T035539_20210507T040616_T47SQA | 20210507 |
| 20210507T035539_20210507T040616_T47SQB | 20210507 |
| 20210507T035539_20210507T040616_T47SQC | 20210507 |

|                                        |          |
|----------------------------------------|----------|
| 20210507T035539_20210507T040616_T48STF | 20210507 |
| 20210507T035539_20210507T040616_T48STG | 20210507 |
| 20210507T035539_20210507T040616_T48STH | 20210507 |
| 20210507T035539_20210507T040616_T48SUF | 20210507 |
| 20210507T035539_20210507T040616_T48SUG | 20210507 |
| 20210508T041551_20210508T042511_T47SLD | 20210508 |
| 20210508T041551_20210508T042511_T47SMC | 20210508 |
| 20210508T041551_20210508T042511_T47SMD | 20210508 |
| 20210508T041551_20210508T042511_T47SNC | 20210508 |
| 20210508T041551_20210508T042511_T47SND | 20210508 |
| 20210508T041551_20210508T042511_T47TLE | 20210508 |
| 20210508T041551_20210508T042511_T47TME | 20210508 |
| 20210509T034531_20210509T035112_T48STF | 20210509 |
| 20210509T034531_20210509T035112_T48SUF | 20210509 |
| 20210509T034531_20210509T035112_T48SUG | 20210509 |
| 20210511T042701_20210511T043213_T46SFJ | 20210511 |
| 20210511T042701_20210511T043213_T46TGK | 20210511 |
| 20210511T042701_20210511T043213_T47TKE | 20210511 |
| 20210511T042701_20210511T043213_T47TLE | 20210511 |
| 20210512T035541_20210512T035742_T47SPB | 20210512 |
| 20210512T035541_20210512T035742_T47SPC | 20210512 |
| 20210512T035541_20210512T035742_T47SQA | 20210512 |
| 20210512T035541_20210512T035742_T47SQC | 20210512 |
| 20210512T035541_20210512T035742_T48STF | 20210512 |
| 20210512T035541_20210512T035742_T48STG | 20210512 |
| 20210512T035541_20210512T035742_T48STH | 20210512 |
| 20210512T035541_20210512T035742_T48SUF | 20210512 |
| 20210512T035541_20210512T035742_T48SUG | 20210512 |
| 20210513T041549_20210513T041605_T46SGH | 20210513 |
| 20210513T041549_20210513T041605_T47SKC | 20210513 |
| 20210513T041549_20210513T041605_T47SLC | 20210513 |
| 20210513T041549_20210513T041605_T47SLD | 20210513 |
| 20210513T041549_20210513T041605_T47SMC | 20210513 |
| 20210513T041549_20210513T041605_T47SMD | 20210513 |
| 20210513T041549_20210513T041605_T47SNC | 20210513 |
| 20210513T041549_20210513T041605_T47SND | 20210513 |
| 20210517T035539_20210517T040738_T48SUF | 20210517 |
| 20210517T035539_20210517T040738_T48SUG | 20210517 |
| 20210520T040549_20210520T040612_T47SND | 20210520 |
| 20210520T040549_20210520T040612_T47SPC | 20210520 |
| 20210520T040549_20210520T040612_T47SPD | 20210520 |
| 20210520T040549_20210520T040612_T47SQB | 20210520 |
| 20210520T040549_20210520T040612_T47SQC | 20210520 |
| 20210523T041549_20210523T041549_T46TGK | 20210523 |

|                                        |          |
|----------------------------------------|----------|
| 20210523T041549_20210523T041549_T47TKE | 20210523 |
| 20210523T041549_20210523T041549_T47TLE | 20210523 |
| 20210523T041549_20210523T041549_T47TME | 20210523 |
| 20210524T034539_20210524T035739_T48STF | 20210524 |
| 20210524T034539_20210524T035739_T48SUF | 20210524 |
| 20210524T034539_20210524T035739_T48SUG | 20210524 |
| 20210526T042709_20210526T043026_T46SFJ | 20210526 |
| 20210526T042709_20210526T043026_T46SGJ | 20210526 |
| 20210526T042709_20210526T043026_T46TGK | 20210526 |
| 20210526T042709_20210526T043026_T47SKD | 20210526 |
| 20210526T042709_20210526T043026_T47SLC | 20210526 |
| 20210526T042709_20210526T043026_T47SLD | 20210526 |
| 20210526T042709_20210526T043026_T47TKE | 20210526 |
| 20210526T042709_20210526T043026_T47TLE | 20210526 |
| 20210527T035539_20210527T040619_T47SPB | 20210527 |
| 20210527T035539_20210527T040619_T47SPC | 20210527 |
| 20210527T035539_20210527T040619_T47SQA | 20210527 |
| 20210527T035539_20210527T040619_T47SQB | 20210527 |
| 20210527T035539_20210527T040619_T47SQC | 20210527 |
| 20210527T035539_20210527T040619_T48STF | 20210527 |
| 20210527T035539_20210527T040619_T48STG | 20210527 |
| 20210527T035539_20210527T040619_T48STH | 20210527 |
| 20210527T035539_20210527T040619_T48SUF | 20210527 |
| 20210527T035539_20210527T040619_T48SUG | 20210527 |
| 20210528T041551_20210528T042256_T46TGK | 20210528 |
| 20210528T041551_20210528T042256_T47TKE | 20210528 |
| 20210528T041551_20210528T042256_T47TLE | 20210528 |
| 20210528T041551_20210528T042256_T47TME | 20210528 |
| 20210529T034541_20210529T035114_T48STF | 20210529 |
| 20210529T034541_20210529T035114_T48SUG | 20210529 |
| 20210530T040549_20210530T040613_T47SNC | 20210530 |
| 20210530T040549_20210530T040613_T47SND | 20210530 |
| 20210530T040549_20210530T040613_T47SPC | 20210530 |
| 20210530T040549_20210530T040613_T47SPD | 20210530 |
| 20210530T040549_20210530T040613_T47SQB | 20210530 |
| 20210530T040549_20210530T040613_T47SQC | 20210530 |
| 20210531T042701_20210531T043207_T46SFH | 20210531 |
| 20210531T042701_20210531T043207_T46SFJ | 20210531 |
| 20210531T042701_20210531T043207_T46TGK | 20210531 |
| 20210531T042701_20210531T043207_T47TKE | 20210531 |
| 20210531T042701_20210531T043207_T47TLE | 20210531 |
| 20210531T042701_20210531T043746_T46SFH | 20210531 |
| 20210601T035541_20210601T040700_T47SPC | 20210601 |
| 20210601T035541_20210601T040700_T47SQA | 20210601 |

|                                        |          |
|----------------------------------------|----------|
| 20210601T035541_20210601T040700_T47SQB | 20210601 |
| 20210601T035541_20210601T040700_T47SQC | 20210601 |
| 20210601T035541_20210601T040700_T48STF | 20210601 |
| 20210601T035541_20210601T040700_T48STG | 20210601 |
| 20210601T035541_20210601T040700_T48STH | 20210601 |
| 20210601T035541_20210601T040700_T48SUF | 20210601 |
| 20210601T035541_20210601T040700_T48SUG | 20210601 |
| 20210602T041549_20210602T041608_T46TGK | 20210602 |
| 20210602T041549_20210602T041608_T47TKE | 20210602 |
| 20210602T041549_20210602T041608_T47TLE | 20210602 |
| 20210603T034539_20210603T035614_T48STF | 20210603 |
| 20210603T034539_20210603T035614_T48SUF | 20210603 |
| 20210603T034539_20210603T035614_T48SUG | 20210603 |
| 20210604T040541_20210604T041217_T47SMC | 20210604 |
| 20210604T040541_20210604T041217_T47SMD | 20210604 |
| 20210604T040541_20210604T041217_T47SNC | 20210604 |
| 20210604T040541_20210604T041217_T47SND | 20210604 |
| 20210604T040541_20210604T041217_T47SPB | 20210604 |
| 20210604T040541_20210604T041217_T47SPC | 20210604 |
| 20210604T040541_20210604T041217_T47SPD | 20210604 |
| 20210604T040541_20210604T041217_T47SQB | 20210604 |
| 20210604T040541_20210604T041217_T47SQC | 20210604 |
| 20210605T042709_20210605T042711_T46SGJ | 20210605 |
| 20210605T042709_20210605T042711_T47SKD | 20210605 |
| 20210605T042709_20210605T042711_T47SLC | 20210605 |
| 20210605T042709_20210605T042711_T47SLD | 20210605 |
| 20210608T034541_20210608T035114_T48SUG | 20210608 |
| 20210609T040549_20210609T040613_T47SMD | 20210609 |
| 20210609T040549_20210609T040613_T47SNC | 20210609 |
| 20210609T040549_20210609T040613_T47SND | 20210609 |
| 20210609T040549_20210609T040613_T47SPB | 20210609 |
| 20210609T040549_20210609T040613_T47SPC | 20210609 |
| 20210609T040549_20210609T040613_T47SPD | 20210609 |
| 20210609T040549_20210609T040613_T47SQB | 20210609 |
| 20210609T040549_20210609T040613_T47SQC | 20210609 |
| 20210611T035541_20210611T035743_T47SPB | 20210611 |
| 20210611T035541_20210611T035743_T47SPC | 20210611 |
| 20210611T035541_20210611T035743_T47SQC | 20210611 |
| 20210611T035541_20210611T035743_T48STH | 20210611 |
| 20210611T035541_20210611T035743_T48SUG | 20210611 |
| 20210614T040541_20210614T041347_T47SMC | 20210614 |
| 20210614T040541_20210614T041347_T47SMD | 20210614 |
| 20210614T040541_20210614T041347_T47SNC | 20210614 |
| 20210614T040541_20210614T041347_T47SND | 20210614 |

|                                        |          |
|----------------------------------------|----------|
| 20210614T040541_20210614T041347_T47SPC | 20210614 |
| 20210614T040541_20210614T041347_T47SPD | 20210614 |
| 20210614T040541_20210614T041347_T47SQC | 20210614 |
| 20210620T042701_20210620T043406_T46SFJ | 20210620 |
| 20210621T035541_20210621T040511_T47SPC | 20210621 |
| 20210621T035541_20210621T040511_T47SQC | 20210621 |
| 20210621T035541_20210621T040511_T48STH | 20210621 |
| 20210623T034539_20210623T035740_T48STF | 20210623 |
| 20210623T034539_20210623T035740_T48SUF | 20210623 |
| 20210623T034539_20210623T035740_T48SUG | 20210623 |
| 20210625T042709_20210625T043026_T46TGK | 20210625 |
| 20210625T042709_20210625T043026_T47TKE | 20210625 |
| 20210625T042709_20210625T043026_T47TLE | 20210625 |
| 20210629T040549_20210629T040613_T47SMC | 20210629 |
| 20210629T040549_20210629T040613_T47SNC | 20210629 |
| 20210629T040549_20210629T040613_T47SPC | 20210629 |
| 20210629T040549_20210629T040613_T47SQC | 20210629 |
| 20210701T035541_20210701T035539_T48SUG | 20210701 |
| 20210701T035541_20210701T040748_T48SUF | 20210701 |
| 20210701T035541_20210701T040748_T48SUG | 20210701 |
| 20210702T041549_20210702T041843_T46SGJ | 20210702 |
| 20210702T041549_20210702T041843_T46TGK | 20210702 |
| 20210702T041549_20210702T041843_T47SKD | 20210702 |
| 20210702T041549_20210702T041843_T47SLC | 20210702 |
| 20210702T041549_20210702T041843_T47SLD | 20210702 |
| 20210702T041549_20210702T041843_T47SMC | 20210702 |
| 20210702T041549_20210702T041843_T47SMD | 20210702 |
| 20210702T041549_20210702T041843_T47SNC | 20210702 |
| 20210702T041549_20210702T041843_T47SND | 20210702 |
| 20210702T041549_20210702T041843_T47TKE | 20210702 |
| 20210702T041549_20210702T041843_T47TLE | 20210702 |
| 20210702T041549_20210702T041843_T47TME | 20210702 |
| 20210703T034539_20210703T035615_T48SUG | 20210703 |
| 20210704T040551_20210704T041216_T47SMC | 20210704 |
| 20210704T040551_20210704T041216_T47SMD | 20210704 |
| 20210704T040551_20210704T041216_T47SNC | 20210704 |
| 20210704T040551_20210704T041216_T47SND | 20210704 |
| 20210704T040551_20210704T041216_T47SPB | 20210704 |
| 20210704T040551_20210704T041216_T47SPC | 20210704 |
| 20210704T040551_20210704T041216_T47SPD | 20210704 |
| 20210704T040551_20210704T041216_T47SQC | 20210704 |
| 20210705T042709_20210705T042712_T46TGK | 20210705 |
| 20210705T042709_20210705T042712_T47SLC | 20210705 |
| 20210705T042709_20210705T042712_T47SLD | 20210705 |



|                                        |          |
|----------------------------------------|----------|
| 20210705T042709_20210705T042712_T47TKE | 20210705 |
| 20210705T042709_20210705T042712_T47TLE | 20210705 |
| 20210706T035539_20210706T040620_T47SPC | 20210706 |
| 20210706T035539_20210706T040620_T47SQC | 20210706 |
| 20210707T041551_20210707T042515_T46SGH | 20210707 |
| 20210707T041551_20210707T042515_T46SGJ | 20210707 |
| 20210707T041551_20210707T042515_T46TGK | 20210707 |
| 20210707T041551_20210707T042515_T47SKC | 20210707 |
| 20210707T041551_20210707T042515_T47SKD | 20210707 |
| 20210707T041551_20210707T042515_T47SLC | 20210707 |
| 20210707T041551_20210707T042515_T47SLD | 20210707 |
| 20210707T041551_20210707T042515_T47SMC | 20210707 |
| 20210707T041551_20210707T042515_T47SMD | 20210707 |
| 20210707T041551_20210707T042515_T47SNC | 20210707 |
| 20210707T041551_20210707T042515_T47SND | 20210707 |
| 20210707T041551_20210707T042515_T47TKE | 20210707 |
| 20210707T041551_20210707T042515_T47TLE | 20210707 |
| 20210707T041551_20210707T042515_T47TME | 20210707 |
| 20210708T034541_20210708T035116_T48STF | 20210708 |
| 20210708T034541_20210708T035116_T48SUF | 20210708 |
| 20210712T041549_20210712T041613_T46SGH | 20210712 |
| 20210712T041549_20210712T041613_T46SGJ | 20210712 |
| 20210712T041549_20210712T041613_T46TGK | 20210712 |
| 20210712T041549_20210712T041613_T47SKC | 20210712 |
| 20210712T041549_20210712T041613_T47SKD | 20210712 |
| 20210712T041549_20210712T041613_T47SLC | 20210712 |
| 20210712T041549_20210712T041613_T47SLD | 20210712 |
| 20210712T041549_20210712T041613_T47SMC | 20210712 |
| 20210712T041549_20210712T041613_T47SMD | 20210712 |
| 20210712T041549_20210712T041613_T47SNC | 20210712 |
| 20210712T041549_20210712T041613_T47SND | 20210712 |
| 20210712T041549_20210712T041613_T47TKE | 20210712 |
| 20210712T041549_20210712T041613_T47TLE | 20210712 |
| 20210712T041549_20210712T041613_T47TME | 20210712 |
| 20210713T034539_20210713T035615_T48STF | 20210713 |
| 20210713T034539_20210713T035615_T48SUF | 20210713 |
| 20210713T034539_20210713T035615_T48SUG | 20210713 |
| 20210716T035539_20210716T035539_T47SPC | 20210716 |
| 20210716T035539_20210716T040741_T47SQC | 20210716 |
| 20210716T035539_20210716T040741_T48STH | 20210716 |
| 20210716T035539_20210716T040741_T48SUG | 20210716 |
| 20210717T041551_20210717T042026_T46TGK | 20210717 |
| 20210717T041551_20210717T042026_T47SLC | 20210717 |
| 20210717T041551_20210717T042026_T47SLD | 20210717 |

|                                        |          |
|----------------------------------------|----------|
| 20210717T041551_20210717T042026_T47SMC | 20210717 |
| 20210717T041551_20210717T042026_T47SMD | 20210717 |
| 20210717T041551_20210717T042026_T47SNC | 20210717 |
| 20210717T041551_20210717T042026_T47SND | 20210717 |
| 20210717T041551_20210717T042026_T47TKE | 20210717 |
| 20210717T041551_20210717T042026_T47TLE | 20210717 |
| 20210717T041551_20210717T042026_T47TME | 20210717 |
| 20210718T034541_20210718T035711_T48SUF | 20210718 |
| 20210719T040549_20210719T040614_T47SPB | 20210719 |
| 20210719T040549_20210719T040614_T47SPC | 20210719 |
| 20210719T040549_20210719T040614_T47SQB | 20210719 |
| 20210719T040549_20210719T040614_T47SQC | 20210719 |
| 20210720T042711_20210720T043409_T47SLC | 20210720 |
| 20210721T035541_20210721T040427_T47SPB | 20210721 |
| 20210721T035541_20210721T040427_T47SPC | 20210721 |
| 20210721T035541_20210721T040427_T47SQA | 20210721 |
| 20210721T035541_20210721T040427_T47SQB | 20210721 |
| 20210721T035541_20210721T040427_T47SQC | 20210721 |
| 20210721T035541_20210721T040427_T48STG | 20210721 |
| 20210721T035541_20210721T040427_T48STH | 20210721 |
| 20210724T040551_20210724T040840_T47SPD | 20210724 |
| 20210724T040551_20210724T040840_T47SQC | 20210724 |
| 20210727T041551_20210727T042254_T47TME | 20210727 |
| 20210728T034541_20210728T034733_T48STF | 20210728 |
| 20210728T034541_20210728T034733_T48SUF | 20210728 |
| 20210729T040549_20210729T040614_T47SMD | 20210729 |
| 20210729T040549_20210729T040614_T47SND | 20210729 |
| 20210729T040549_20210729T040614_T47SPB | 20210729 |
| 20210729T040549_20210729T040614_T47SPC | 20210729 |
| 20210729T040549_20210729T040614_T47SPD | 20210729 |
| 20210729T040549_20210729T040614_T47SQB | 20210729 |
| 20210729T040549_20210729T040614_T47SQC | 20210729 |
| 20210730T042711_20210730T043210_T46SFH | 20210730 |
| 20210730T042711_20210730T043210_T46SFJ | 20210730 |
| 20210730T042711_20210730T043210_T46SGH | 20210730 |
| 20210730T042711_20210730T043210_T46SGJ | 20210730 |
| 20210730T042711_20210730T043210_T46TGK | 20210730 |
| 20210730T042711_20210730T043210_T47SKC | 20210730 |
| 20210730T042711_20210730T043210_T47SKD | 20210730 |
| 20210730T042711_20210730T043210_T47SLC | 20210730 |
| 20210730T042711_20210730T043210_T47SLD | 20210730 |
| 20210730T042711_20210730T043210_T47TKE | 20210730 |
| 20210730T042711_20210730T043210_T47TLE | 20210730 |
| 20210730T042711_20210730T043749_T46SFH | 20210730 |

|                                        |          |
|----------------------------------------|----------|
| 20210730T042711_20210730T043749_T46SGH | 20210730 |
| 20210730T042711_20210730T043749_T47SKC | 20210730 |
| 20210731T035541_20210731T040702_T47SPB | 20210731 |
| 20210731T035541_20210731T040702_T47SPC | 20210731 |
| 20210731T035541_20210731T040702_T47SQA | 20210731 |
| 20210731T035541_20210731T040702_T47SQB | 20210731 |
| 20210731T035541_20210731T040702_T47SQC | 20210731 |
| 20210731T035541_20210731T040702_T48STF | 20210731 |
| 20210731T035541_20210731T040702_T48STG | 20210731 |
| 20210731T035541_20210731T040702_T48STH | 20210731 |
| 20210731T035541_20210731T040702_T48SUF | 20210731 |
| 20210731T035541_20210731T040702_T48SUG | 20210731 |
| 20210801T041549_20210801T041843_T47SMC | 20210801 |
| 20210801T041549_20210801T041843_T47SNC | 20210801 |
| 20210802T034539_20210802T035615_T48STF | 20210802 |
| 20210802T034539_20210802T035615_T48SUF | 20210802 |
| 20210803T040551_20210803T041219_T47SMD | 20210803 |
| 20210803T040551_20210803T041219_T47SND | 20210803 |
| 20210803T040551_20210803T041219_T47SPD | 20210803 |
| 20210804T042709_20210804T042712_T46SFH | 20210804 |
| 20210804T042709_20210804T042712_T46SFJ | 20210804 |
| 20210804T042709_20210804T042712_T46SGH | 20210804 |
| 20210804T042709_20210804T042712_T46SGJ | 20210804 |
| 20210804T042709_20210804T042712_T46TGK | 20210804 |
| 20210804T042709_20210804T042712_T47SKC | 20210804 |
| 20210804T042709_20210804T042712_T47SKD | 20210804 |
| 20210804T042709_20210804T042712_T47SLC | 20210804 |
| 20210804T042709_20210804T042712_T47TKE | 20210804 |
| 20210804T042709_20210804T042712_T47TLE | 20210804 |
| 20210805T035539_20210805T040620_T47SPC | 20210805 |
| 20210805T035539_20210805T040620_T47SQA | 20210805 |
| 20210805T035539_20210805T040620_T47SQC | 20210805 |
| 20210805T035539_20210805T040620_T48STF | 20210805 |
| 20210805T035539_20210805T040620_T48STH | 20210805 |
| 20210805T035539_20210805T040620_T48SUF | 20210805 |
| 20210805T035539_20210805T040620_T48SUG | 20210805 |
| 20210806T041551_20210806T042319_T46TGK | 20210806 |
| 20210806T041551_20210806T042319_T47SND | 20210806 |
| 20210806T041551_20210806T042319_T47TKE | 20210806 |
| 20210806T041551_20210806T042319_T47TLE | 20210806 |
| 20210806T041551_20210806T042319_T47TME | 20210806 |
| 20210807T034541_20210807T035116_T48STF | 20210807 |
| 20210807T034541_20210807T035116_T48SUF | 20210807 |
| 20210808T040549_20210808T040613_T47SND | 20210808 |

|                                        |          |
|----------------------------------------|----------|
| 20210809T042711_20210809T043231_T46TGK | 20210809 |
| 20210809T042711_20210809T043231_T47SLC | 20210809 |
| 20210809T042711_20210809T043231_T47SLD | 20210809 |
| 20210809T042711_20210809T043231_T47TKE | 20210809 |
| 20210809T042711_20210809T043231_T47TLE | 20210809 |
| 20210811T041549_20210811T042222_T46TGK | 20210811 |
| 20210811T041549_20210811T042222_T47TKE | 20210811 |
| 20210811T041549_20210811T042222_T47TLE | 20210811 |
| 20210811T041549_20210811T042222_T47TME | 20210811 |
| 20210813T040551_20210813T041349_T47SMC | 20210813 |
| 20210813T040551_20210813T041349_T47SMD | 20210813 |
| 20210813T040551_20210813T041349_T47SNC | 20210813 |
| 20210813T040551_20210813T041349_T47SND | 20210813 |
| 20210813T040551_20210813T041349_T47SPB | 20210813 |
| 20210813T040551_20210813T041349_T47SPC | 20210813 |
| 20210813T040551_20210813T041349_T47SPD | 20210813 |
| 20210813T040551_20210813T041349_T47SQB | 20210813 |
| 20210813T040551_20210813T041349_T47SQC | 20210813 |
| 20210814T042709_20210814T042819_T46TGK | 20210814 |
| 20210814T042709_20210814T042819_T47SKC | 20210814 |
| 20210814T042709_20210814T042819_T47SLC | 20210814 |
| 20210814T042709_20210814T042819_T47TKE | 20210814 |
| 20210814T042709_20210814T042819_T47TLE | 20210814 |
| 20210815T035539_20210815T040739_T48STH | 20210815 |
| 20210815T035539_20210815T040739_T48SUG | 20210815 |
| 20210816T041551_20210816T042108_T46SGH | 20210816 |
| 20210816T041551_20210816T042108_T46SGJ | 20210816 |
| 20210816T041551_20210816T042108_T46TGK | 20210816 |
| 20210816T041551_20210816T042108_T47SKC | 20210816 |
| 20210816T041551_20210816T042108_T47SKD | 20210816 |
| 20210816T041551_20210816T042108_T47SLD | 20210816 |
| 20210816T041551_20210816T042108_T47TKE | 20210816 |
| 20210816T041551_20210816T042108_T47TLE | 20210816 |
| 20210816T041551_20210816T042108_T47TME | 20210816 |
| 20210819T042711_20210819T043408_T46SFH | 20210819 |
| 20210819T042711_20210819T043408_T46SFJ | 20210819 |
| 20210819T042711_20210819T043408_T46SGH | 20210819 |
| 20210819T042711_20210819T043408_T46SGJ | 20210819 |
| 20210819T042711_20210819T043408_T46TGK | 20210819 |
| 20210819T042711_20210819T043408_T47SKC | 20210819 |
| 20210819T042711_20210819T043408_T47SKD | 20210819 |
| 20210819T042711_20210819T043408_T47SLC | 20210819 |
| 20210819T042711_20210819T043408_T47SLD | 20210819 |
| 20210819T042711_20210819T043408_T47TKE | 20210819 |

|                                        |          |
|----------------------------------------|----------|
| 20210819T042711_20210819T043408_T47TLE | 20210819 |
| 20210820T035541_20210820T040513_T47SPC | 20210820 |
| 20210820T035541_20210820T040513_T47SQC | 20210820 |
| 20210820T035541_20210820T040513_T48STH | 20210820 |
| 20210820T035541_20210820T040513_T48SUF | 20210820 |
| 20210820T035541_20210820T040513_T48SUG | 20210820 |
| 20210821T041549_20210821T041548_T46SGH | 20210821 |
| 20210821T041549_20210821T041548_T46SGJ | 20210821 |
| 20210821T041549_20210821T041548_T46TGK | 20210821 |
| 20210821T041549_20210821T041548_T47SKC | 20210821 |
| 20210821T041549_20210821T041548_T47SKD | 20210821 |
| 20210821T041549_20210821T041548_T47SLD | 20210821 |
| 20210821T041549_20210821T041548_T47SMD | 20210821 |
| 20210821T041549_20210821T041548_T47SND | 20210821 |
| 20210821T041549_20210821T041548_T47TKE | 20210821 |
| 20210821T041549_20210821T041548_T47TLE | 20210821 |
| 20210821T041549_20210821T041548_T47TME | 20210821 |
| 20210823T040551_20210823T040922_T47SND | 20210823 |
| 20210823T040551_20210823T040922_T47SPD | 20210823 |
| 20210823T040551_20210823T040922_T47SQC | 20210823 |
| 20210824T042659_20210824T043002_T46TGK | 20210824 |
| 20210824T042659_20210824T043002_T47SLD | 20210824 |
| 20210824T042659_20210824T043002_T47TKE | 20210824 |
| 20210824T042659_20210824T043002_T47TLE | 20210824 |
| 20210826T041551_20210826T042257_T47SMC | 20210826 |
| 20210826T041551_20210826T042257_T47SND | 20210826 |
| 20210826T041551_20210826T042257_T47TME | 20210826 |
| 20210828T040539_20210828T040610_T47SND | 20210828 |
| 20210828T040539_20210828T040610_T47SPD | 20210828 |
| 20210831T041549_20210831T041741_T46SGH | 20210831 |
| 20210831T041549_20210831T041741_T46SGJ | 20210831 |
| 20210831T041549_20210831T041741_T46TGK | 20210831 |
| 20210831T041549_20210831T041741_T47SKC | 20210831 |
| 20210831T041549_20210831T041741_T47SKD | 20210831 |
| 20210831T041549_20210831T041741_T47SLC | 20210831 |
| 20210831T041549_20210831T041741_T47SLD | 20210831 |
| 20210831T041549_20210831T041741_T47TKE | 20210831 |
| 20210901T034529_20210901T035501_T48STF | 20210901 |
| 20210901T034529_20210901T035501_T48SUF | 20210901 |
| 20210901T034529_20210901T035501_T48SUG | 20210901 |
| 20210903T042659_20210903T042700_T46SFH | 20210903 |
| 20210903T042659_20210903T042700_T46SFJ | 20210903 |
| 20210903T042659_20210903T042700_T46SGH | 20210903 |
| 20210903T042659_20210903T042700_T47SKC | 20210903 |

|                                        |          |
|----------------------------------------|----------|
| 20210903T042659_20210903T042700_T47SLC | 20210903 |
| 20210903T042659_20210903T042700_T47TLE | 20210903 |
| 20210904T035539_20210904T040456_T47SQC | 20210904 |
| 20210904T035539_20210904T040456_T48STH | 20210904 |
| 20210905T041551_20210905T042513_T47SNC | 20210905 |
| 20210906T034541_20210906T035114_T48SUG | 20210906 |
| 20210907T040539_20210907T040609_T47SNC | 20210907 |
| 20210907T040539_20210907T040609_T47SND | 20210907 |
| 20210907T040539_20210907T040609_T47SPB | 20210907 |
| 20210907T040539_20210907T040609_T47SPC | 20210907 |
| 20210907T040539_20210907T040609_T47SPD | 20210907 |
| 20210907T040539_20210907T040609_T47SQB | 20210907 |
| 20210907T040539_20210907T040609_T47SQC | 20210907 |
| 20210908T042701_20210908T043714_T46SFH | 20210908 |
| 20210908T042701_20210908T043714_T46SFJ | 20210908 |
| 20210908T042701_20210908T043714_T46SGH | 20210908 |
| 20210908T042701_20210908T043714_T46SGJ | 20210908 |
| 20210908T042701_20210908T043714_T46TGK | 20210908 |
| 20210908T042701_20210908T043714_T47SKC | 20210908 |
| 20210908T042701_20210908T043714_T47SKD | 20210908 |
| 20210908T042701_20210908T043714_T47SLC | 20210908 |
| 20210908T042701_20210908T043714_T47SLD | 20210908 |
| 20210908T042701_20210908T043714_T47TKE | 20210908 |
| 20210908T042701_20210908T043714_T47TLE | 20210908 |
| 20210909T035541_20210909T035830_T47SPB | 20210909 |
| 20210909T035541_20210909T035830_T47SPC | 20210909 |
| 20210909T035541_20210909T035830_T47SQA | 20210909 |
| 20210909T035541_20210909T035830_T47SQB | 20210909 |
| 20210909T035541_20210909T035830_T47SQC | 20210909 |
| 20210909T035541_20210909T035830_T48STF | 20210909 |
| 20210909T035541_20210909T035830_T48STG | 20210909 |
| 20210909T035541_20210909T035830_T48STH | 20210909 |
| 20210909T035541_20210909T035830_T48SUF | 20210909 |
| 20210909T035541_20210909T035830_T48SUG | 20210909 |
| 20210910T041549_20210910T042634_T46TGK | 20210910 |
| 20210910T041549_20210910T042634_T47SMD | 20210910 |
| 20210910T041549_20210910T042634_T47SNC | 20210910 |
| 20210910T041549_20210910T042634_T47SND | 20210910 |
| 20210910T041549_20210910T042634_T47TKE | 20210910 |
| 20210910T041549_20210910T042634_T47TLE | 20210910 |
| 20210910T041549_20210910T042634_T47TME | 20210910 |
| 20210911T034529_20210911T035351_T48SUF | 20210911 |
| 20210911T034529_20210911T035351_T48SUG | 20210911 |
| 20210915T041551_20210915T042024_T46SGJ | 20210915 |

|                                        |          |
|----------------------------------------|----------|
| 20210915T041551_20210915T042024_T46TGK | 20210915 |
| 20210915T041551_20210915T042024_T47SKD | 20210915 |
| 20210915T041551_20210915T042024_T47SLD | 20210915 |
| 20210915T041551_20210915T042024_T47TKE | 20210915 |
| 20210915T041551_20210915T042024_T47TLE | 20210915 |
| 20210915T041551_20210915T042024_T47TME | 20210915 |
| 20210916T034541_20210916T035115_T48SUG | 20210916 |
| 20210917T040539_20210917T040608_T47SND | 20210917 |
| 20210917T040539_20210917T040608_T47SPD | 20210917 |
| 20210920T041549_20210920T042429_T46SGJ | 20210920 |
| 20210920T041549_20210920T042429_T46TGK | 20210920 |
| 20210920T041549_20210920T042429_T47SKD | 20210920 |
| 20210920T041549_20210920T042429_T47SLD | 20210920 |
| 20210920T041549_20210920T042429_T47SMC | 20210920 |
| 20210920T041549_20210920T042429_T47SMD | 20210920 |
| 20210920T041549_20210920T042429_T47SNC | 20210920 |
| 20210920T041549_20210920T042429_T47SND | 20210920 |
| 20210920T041549_20210920T042429_T47TKE | 20210920 |
| 20210920T041549_20210920T042429_T47TLE | 20210920 |
| 20210920T041549_20210920T042429_T47TME | 20210920 |
| 20210921T034529_20210921T035407_T48STF | 20210921 |
| 20210921T034529_20210921T035407_T48SUF | 20210921 |
| 20210921T034529_20210921T035407_T48SUG | 20210921 |
| 20210922T040551_20210922T041516_T47SMC | 20210922 |
| 20210922T040551_20210922T041516_T47SNC | 20210922 |
| 20210922T040551_20210922T041516_T47SND | 20210922 |
| 20210922T040551_20210922T041516_T47SPC | 20210922 |
| 20210922T040551_20210922T041516_T47SPD | 20210922 |
| 20210922T040551_20210922T041516_T47SQC | 20210922 |
| 20210924T035539_20210924T040703_T47SPB | 20210924 |
| 20210924T035539_20210924T040703_T47SPC | 20210924 |
| 20210924T035539_20210924T040703_T47SQB | 20210924 |
| 20210924T035539_20210924T040703_T47SQC | 20210924 |
| 20210924T035539_20210924T040703_T48STG | 20210924 |
| 20210924T035539_20210924T040703_T48STH | 20210924 |
| 20210924T035539_20210924T040703_T48SUG | 20210924 |
| 20210925T041551_20210925T042254_T47SLC | 20210925 |
| 20210925T041551_20210925T042254_T47SMC | 20210925 |
| 20210925T041551_20210925T042254_T47SNC | 20210925 |
| 20210925T041551_20210925T042254_T47SND | 20210925 |
| 20210928T042711_20210928T043211_T46SFH | 20210928 |
| 20210928T042711_20210928T043211_T46SFJ | 20210928 |
| 20210928T042711_20210928T043211_T46SGJ | 20210928 |
| 20210928T042711_20210928T043211_T46TGK | 20210928 |

|                                        |          |
|----------------------------------------|----------|
| 20210928T042711_20210928T043211_T47SKD | 20210928 |
| 20210928T042711_20210928T043211_T47SLD | 20210928 |
| 20210928T042711_20210928T043211_T47TKE | 20210928 |
| 20210928T042711_20210928T043211_T47TLE | 20210928 |
| 20210928T042711_20210928T043747_T46SFH | 20210928 |
| 20210929T035541_20210929T040703_T47SPB | 20210929 |
| 20210929T035541_20210929T040703_T47SPC | 20210929 |
| 20210929T035541_20210929T040703_T47SQB | 20210929 |
| 20210929T035541_20210929T040703_T47SQC | 20210929 |
| 20210929T035541_20210929T040703_T48STG | 20210929 |
| 20210929T035541_20210929T040703_T48STH | 20210929 |
| 20210929T035541_20210929T040703_T48SUG | 20210929 |
| 20210930T041549_20210930T041550_T46TGK | 20210930 |
| 20210930T041549_20210930T041550_T47SLD | 20210930 |
| 20210930T041549_20210930T041550_T47SMC | 20210930 |
| 20210930T041549_20210930T041550_T47SMD | 20210930 |
| 20210930T041549_20210930T041550_T47SNC | 20210930 |
| 20210930T041549_20210930T041550_T47SND | 20210930 |
| 20210930T041549_20210930T041550_T47TKE | 20210930 |
| 20210930T041549_20210930T041550_T47TLE | 20210930 |
| 20210930T041549_20210930T041550_T47TME | 20210930 |
| 20210930T041549_20210930T042733_T47SMC | 20210930 |
| 20210930T041549_20210930T042733_T47SNC | 20210930 |
| 20211001T034549_20211001T035637_T48STF | 20211001 |
| 20211001T034549_20211001T035637_T48SUF | 20211001 |
| 20211001T034549_20211001T035637_T48SUG | 20211001 |
| 20211002T040611_20211002T041238_T47SPB | 20211002 |
| 20211002T040611_20211002T041238_T47SPC | 20211002 |
| 20211002T040611_20211002T041238_T47SQB | 20211002 |
| 20211002T040611_20211002T041238_T47SQC | 20211002 |
| 20211003T042709_20211003T042721_T47SLC | 20211003 |
| 20211006T034631_20211006T035454_T48SUG | 20211006 |
| 20211007T040639_20211007T040633_T47SMC | 20211007 |
| 20211007T040639_20211007T040633_T47SMD | 20211007 |
| 20211007T040639_20211007T040633_T47SND | 20211007 |
| 20211007T040639_20211007T040633_T47SPB | 20211007 |
| 20211007T040639_20211007T040633_T47SPC | 20211007 |
| 20211007T040639_20211007T040633_T47SPD | 20211007 |
| 20211007T040639_20211007T040633_T47SQB | 20211007 |
| 20211007T040639_20211007T040633_T47SQC | 20211007 |
| 20211009T035651_20211009T035856_T47SPB | 20211009 |
| 20211011T034659_20211011T035341_T48SUG | 20211011 |
| 20211011T034659_20211011T035750_T48STF | 20211011 |
| 20211011T034659_20211011T035750_T48SUF | 20211011 |



|                                        |          |
|----------------------------------------|----------|
| 20211011T034659_20211011T035750_T48SUG | 20211011 |
| 20211012T040721_20211012T041700_T47SMC | 20211012 |
| 20211012T040721_20211012T041700_T47SNC | 20211012 |
| 20211012T040721_20211012T041700_T47SPB | 20211012 |
| 20211012T040721_20211012T041700_T47SQB | 20211012 |
| 20211013T042729_20211013T042726_T46SFH | 20211013 |
| 20211013T042729_20211013T042726_T46SFJ | 20211013 |
| 20211013T042729_20211013T042726_T46SGH | 20211013 |
| 20211013T042729_20211013T042726_T46SGJ | 20211013 |
| 20211013T042729_20211013T042726_T47SKC | 20211013 |
| 20211013T042729_20211013T042726_T47SLC | 20211013 |
| 20211015T041741_20211015T042402_T47SNC | 20211015 |
| 20211015T041741_20211015T042402_T47SND | 20211015 |
| 20211015T041741_20211015T042402_T47TME | 20211015 |
| 20211017T040749_20211017T040745_T47SNC | 20211017 |
| 20211017T040749_20211017T040745_T47SND | 20211017 |
| 20211017T040749_20211017T040745_T47SPB | 20211017 |
| 20211017T040749_20211017T040745_T47SPC | 20211017 |
| 20211017T040749_20211017T040745_T47SPD | 20211017 |
| 20211017T040749_20211017T040745_T47SQB | 20211017 |
| 20211017T040749_20211017T040745_T47SQC | 20211017 |
| 20211020T041809_20211020T042514_T46TGK | 20211020 |
| 20211020T041809_20211020T042514_T47SND | 20211020 |
| 20211020T041809_20211020T042514_T47TKE | 20211020 |
| 20211020T041809_20211020T042514_T47TLE | 20211020 |
| 20211020T041809_20211020T042514_T47TME | 20211020 |
| 20211021T034809_20211021T035512_T48SUF | 20211021 |
| 20211021T034809_20211021T035512_T48SUG | 20211021 |
| 20211022T040821_20211022T041338_T47SMD | 20211022 |
| 20211022T040821_20211022T041338_T47SND | 20211022 |
| 20211022T040821_20211022T041338_T47SPB | 20211022 |
| 20211022T040821_20211022T041338_T47SPC | 20211022 |
| 20211022T040821_20211022T041338_T47SPD | 20211022 |
| 20211022T040821_20211022T041338_T47SQC | 20211022 |
| 20211023T042829_20211023T043044_T46SFH | 20211023 |
| 20211023T042829_20211023T043044_T46SFJ | 20211023 |
| 20211023T042829_20211023T043044_T46TGK | 20211023 |
| 20211023T042829_20211023T043044_T47TKE | 20211023 |
| 20211023T042829_20211023T043044_T47TLE | 20211023 |
| 20211024T035819_20211024T040700_T47SPB | 20211024 |
| 20211024T035819_20211024T040700_T47SPC | 20211024 |
| 20211024T035819_20211024T040700_T47SQC | 20211024 |
| 20211024T035819_20211024T040700_T48STH | 20211024 |
| 20211027T040849_20211027T040848_T47SNC | 20211027 |

|                                        |          |
|----------------------------------------|----------|
| 20211027T040849_20211027T040848_T47SND | 20211027 |
| 20211027T040849_20211027T040848_T47SPB | 20211027 |
| 20211027T040849_20211027T040848_T47SPC | 20211027 |
| 20211027T040849_20211027T040848_T47SPD | 20211027 |
| 20211027T040849_20211027T040848_T47SQB | 20211027 |
| 20211027T040849_20211027T040848_T47SQC | 20211027 |
| 20211028T042911_20211028T042905_T46SFJ | 20211028 |
| 20211028T042911_20211028T042905_T46SGJ | 20211028 |
| 20211028T042911_20211028T042905_T46TGK | 20211028 |
| 20211028T042911_20211028T042905_T47SKD | 20211028 |
| 20211028T042911_20211028T042905_T47SLC | 20211028 |
| 20211028T042911_20211028T042905_T47SLD | 20211028 |
| 20211028T042911_20211028T042905_T47TKE | 20211028 |
| 20211028T042911_20211028T042905_T47TLE | 20211028 |
| 20211029T035901_20211029T040045_T47SPB | 20211029 |
| 20211029T035901_20211029T040045_T47SPC | 20211029 |
| 20211029T035901_20211029T040045_T47SQA | 20211029 |
| 20211029T035901_20211029T040045_T47SQB | 20211029 |
| 20211029T035901_20211029T040045_T47SQC | 20211029 |
| 20211029T035901_20211029T040045_T48STF | 20211029 |
| 20211029T035901_20211029T040045_T48STG | 20211029 |
| 20211029T035901_20211029T040045_T48STH | 20211029 |
| 20211029T035901_20211029T040045_T48SUF | 20211029 |
| 20211029T035901_20211029T040045_T48SUG | 20211029 |
| 20211030T041909_20211030T042055_T46TGK | 20211030 |
| 20211030T041909_20211030T042055_T47SMD | 20211030 |
| 20211030T041909_20211030T042055_T47SND | 20211030 |
| 20211030T041909_20211030T042055_T47TKE | 20211030 |
| 20211030T041909_20211030T042055_T47TLE | 20211030 |
| 20211030T041909_20211030T042055_T47TME | 20211030 |
| 20211031T034909_20211031T035715_T48STF | 20211031 |
| 20211031T034909_20211031T035715_T48SUF | 20211031 |
| 20211031T034909_20211031T035715_T48SUG | 20211031 |
| 20211101T040921_20211101T040921_T47SND | 20211101 |
| 20211101T040921_20211101T040921_T47SPC | 20211101 |
| 20211101T040921_20211101T040921_T47SPD | 20211101 |
| 20211101T040921_20211101T040921_T47SQC | 20211101 |
| 20211102T042929_20211102T042931_T46SFH | 20211102 |
| 20211102T042929_20211102T042931_T46SFJ | 20211102 |
| 20211102T042929_20211102T042931_T46TGK | 20211102 |
| 20211102T042929_20211102T042931_T47TKE | 20211102 |
| 20211102T042929_20211102T042931_T47TLE | 20211102 |
| 20211103T035929_20211103T035925_T47SPC | 20211103 |
| 20211103T035929_20211103T035925_T47SQA | 20211103 |

|                                        |          |
|----------------------------------------|----------|
| 20211103T035929_20211103T035925_T47SQB | 20211103 |
| 20211103T035929_20211103T035925_T47SQC | 20211103 |
| 20211103T035929_20211103T035925_T48STF | 20211103 |
| 20211103T035929_20211103T035925_T48STG | 20211103 |
| 20211103T035929_20211103T035925_T48STH | 20211103 |
| 20211103T035929_20211103T035925_T48SUF | 20211103 |
| 20211103T035929_20211103T035925_T48SUG | 20211103 |
| 20211104T041941_20211104T041941_T47SND | 20211104 |
| 20211104T041941_20211104T041941_T47TLE | 20211104 |
| 20211104T041941_20211104T041941_T47TME | 20211104 |
| 20211105T034941_20211105T035710_T48STF | 20211105 |
| 20211105T034941_20211105T035710_T48SUF | 20211105 |
| 20211105T034941_20211105T035710_T48SUG | 20211105 |
| 20211108T035951_20211108T040402_T47SQA | 20211108 |
| 20211108T035951_20211108T040402_T48STF | 20211108 |
| 20211108T035951_20211108T040402_T48SUF | 20211108 |
| 20211110T034959_20211110T034956_T48STF | 20211110 |
| 20211110T034959_20211110T034956_T48SUF | 20211110 |
| 20211110T034959_20211110T034956_T48SUG | 20211110 |
| 20211111T041011_20211111T041011_T47SPD | 20211111 |
| 20211113T040019_20211113T040014_T47SQA | 20211113 |
| 20211113T040019_20211113T040014_T47SQB | 20211113 |
| 20211113T040019_20211113T040014_T47SQC | 20211113 |
| 20211113T040019_20211113T040014_T48STF | 20211113 |
| 20211113T040019_20211113T040014_T48STG | 20211113 |
| 20211113T040019_20211113T040014_T48STH | 20211113 |
| 20211113T040019_20211113T040014_T48SUF | 20211113 |
| 20211113T040019_20211113T040014_T48SUG | 20211113 |
| 20211114T042031_20211114T042029_T47TLE | 20211114 |
| 20211115T035021_20211115T035022_T48STF | 20211115 |
| 20211115T035021_20211115T035022_T48SUF | 20211115 |
| 20211115T035021_20211115T035022_T48SUG | 20211115 |
| 20211116T041029_20211116T041032_T47SND | 20211116 |
| 20211116T041029_20211116T041032_T47SPD | 20211116 |
| 20211118T040041_20211118T040037_T47SPC | 20211118 |
| 20211118T040041_20211118T040037_T47SQA | 20211118 |
| 20211118T040041_20211118T040037_T47SQB | 20211118 |
| 20211118T040041_20211118T040037_T47SQC | 20211118 |
| 20211118T040041_20211118T040037_T48STF | 20211118 |
| 20211118T040041_20211118T040037_T48STG | 20211118 |
| 20211118T040041_20211118T040037_T48STH | 20211118 |
| 20211118T040041_20211118T040037_T48SUF | 20211118 |
| 20211118T040041_20211118T040037_T48SUG | 20211118 |
| 20211120T035039_20211120T035040_T48STF | 20211120 |

|                                        |          |
|----------------------------------------|----------|
| 20211120T035039_20211120T035040_T48SUF | 20211120 |
| 20211120T035039_20211120T035040_T48SUG | 20211120 |
| 20211123T040059_20211123T040054_T47SQA | 20211123 |
| 20211123T040059_20211123T040054_T48STF | 20211123 |
| 20211123T040059_20211123T040054_T48SUF | 20211123 |
| 20211124T042111_20211124T042110_T47TME | 20211124 |
| 20211125T035101_20211125T035557_T48STF | 20211125 |
| 20211125T035101_20211125T035557_T48SUF | 20211125 |
| 20211125T035101_20211125T035557_T48SUG | 20211125 |
| 20211126T041109_20211126T041108_T47SPB | 20211126 |
| 20211126T041109_20211126T041108_T47SPC | 20211126 |
| 20211126T041109_20211126T041108_T47SPD | 20211126 |
| 20211126T041109_20211126T041108_T47SQC | 20211126 |
| 20211127T043121_20211127T043153_T46SFH | 20211127 |
| 20211128T040121_20211128T040434_T47SPB | 20211128 |
| 20211128T040121_20211128T040434_T47SQA | 20211128 |
| 20211128T040121_20211128T040434_T47SQB | 20211128 |
| 20211203T040129_20211203T040125_T47SQA | 20211203 |
| 20211203T040129_20211203T040125_T47SQC | 20211203 |
| 20211203T040129_20211203T040125_T48STF | 20211203 |
| 20211203T040129_20211203T040125_T48STG | 20211203 |
| 20211203T040129_20211203T040125_T48SUF | 20211203 |
| 20211204T042141_20211204T042140_T47TLE | 20211204 |
| 20211204T042141_20211204T042140_T47TME | 20211204 |
| 20211205T035131_20211205T035658_T48STF | 20211205 |
| 20211205T035131_20211205T035658_T48SUF | 20211205 |
| 20211205T035131_20211205T035658_T48SUG | 20211205 |
| 20211206T041139_20211206T041134_T47SPD | 20211206 |
| 20211206T041139_20211206T041134_T47SQC | 20211206 |
| 20211207T043151_20211207T043148_T46SFH | 20211207 |
| 20211207T043151_20211207T043148_T46SFJ | 20211207 |
| 20211207T043151_20211207T043148_T47SLC | 20211207 |
| 20211207T043151_20211207T043148_T47SLD | 20211207 |
| 20211208T040141_20211208T040140_T47SPB | 20211208 |
| 20211208T040141_20211208T040140_T47SPC | 20211208 |
| 20211208T040141_20211208T040140_T47SQA | 20211208 |
| 20211208T040141_20211208T040140_T47SQB | 20211208 |
| 20211208T040141_20211208T040140_T47SQC | 20211208 |
| 20211208T040141_20211208T040140_T48STF | 20211208 |
| 20211208T040141_20211208T040140_T48STG | 20211208 |
| 20211208T040141_20211208T040140_T48STH | 20211208 |
| 20211208T040141_20211208T040140_T48SUF | 20211208 |
| 20211210T035139_20211210T035136_T48SUG | 20211210 |
| 20211211T041141_20211211T041143_T47SPD | 20211211 |

|                                        |          |
|----------------------------------------|----------|
| 20211211T041141_20211211T041143_T47SQC | 20211211 |
| 20211214T042201_20211214T042155_T47TME | 20211214 |
| 20211216T041149_20211216T041143_T47SND | 20211216 |
| 20211216T041149_20211216T041143_T47SPD | 20211216 |
| 20211217T043211_20211217T043206_T46TGK | 20211217 |
| 20211217T043211_20211217T043206_T47TKE | 20211217 |
| 20211217T043211_20211217T043206_T47TLE | 20211217 |
| 20211218T040201_20211218T040156_T48STH | 20211218 |
| 20211220T035149_20211220T035146_T48STF | 20211220 |
| 20211220T035149_20211220T035146_T48SUF | 20211220 |
| 20211221T041151_20211221T041152_T47SND | 20211221 |
| 20211221T041151_20211221T041152_T47SPD | 20211221 |
| 20211223T040149_20211223T040151_T47SQA | 20211223 |
| 20211223T040149_20211223T040151_T47SQC | 20211223 |
| 20211223T040149_20211223T040151_T48STG | 20211223 |
| 20211223T040149_20211223T040151_T48STH | 20211223 |
| 20211224T042201_20211224T042159_T46TGK | 20211224 |
| 20211224T042201_20211224T042159_T47TKE | 20211224 |
| 20211224T042201_20211224T042159_T47TLE | 20211224 |
| 20211224T042201_20211224T042159_T47TME | 20211224 |
| 20211227T043211_20211227T043324_T46TGK | 20211227 |
| 20211227T043211_20211227T043324_T47TKE | 20211227 |
| 20211228T040201_20211228T040638_T48SUF | 20211228 |
| 20211229T042149_20211229T042426_T47TLE | 20211229 |

Table S2 List of Sentinel-1 images used in this study.

| Image ID                                                            | Date     |
|---------------------------------------------------------------------|----------|
| S1A_IW_GRDH_1SDV_20210101T233515_20210101T233540_035951_04360D_E508 | 20210101 |
| S1A_IW_GRDH_1SDV_20210101T233540_20210101T233605_035951_04360D_35F5 | 20210101 |
| S1A_IW_GRDH_1SDV_20210103T231856_20210103T231921_035980_043713_60B8 | 20210103 |
| S1A_IW_GRDH_1SDV_20210103T231921_20210103T231946_035980_043713_C14E | 20210103 |
| S1A_IW_GRDH_1SDV_20210106T234324_20210106T234349_036024_043895_AF88 | 20210106 |
| S1A_IW_GRDH_1SDV_20210106T234349_20210106T234414_036024_043895_98F4 | 20210106 |
| S1A_IW_GRDH_1SDV_20210108T232705_20210108T232730_036053_0439A7_2C53 | 20210108 |
| S1A_IW_GRDH_1SDV_20210108T232730_20210108T232755_036053_0439A7_4167 | 20210108 |
| S1A_IW_GRDH_1SDV_20210110T231046_20210110T231111_036082_043AB1_9496 | 20210110 |
| S1A_IW_GRDH_1SDV_20210110T231111_20210110T231136_036082_043AB1_64AB | 20210110 |
| S1A_IW_GRDH_1SDV_20210113T233515_20210113T233540_036126_043C41_0DAE | 20210113 |
| S1A_IW_GRDH_1SDV_20210113T233540_20210113T233605_036126_043C41_912A | 20210113 |
| S1A_IW_GRDH_1SDV_20210115T231856_20210115T231921_036155_043D37_EBA7 | 20210115 |
| S1A_IW_GRDH_1SDV_20210115T231921_20210115T231946_036155_043D37_F6F4 | 20210115 |
| S1A_IW_GRDH_1SDV_20210118T234323_20210118T234348_036199_043EBB_A7DA | 20210118 |
| S1A_IW_GRDH_1SDV_20210118T234348_20210118T234413_036199_043EBB_2F30 | 20210118 |
| S1A_IW_GRDH_1SDV_20210120T232704_20210120T232729_036228_043FCB_9A9A | 20210120 |
| S1A_IW_GRDH_1SDV_20210120T232729_20210120T232754_036228_043FCB_37E2 | 20210120 |
| S1A_IW_GRDH_1SDV_20210122T231046_20210122T231111_036257_0440CD_7AC8 | 20210122 |
| S1A_IW_GRDH_1SDV_20210122T231111_20210122T231136_036257_0440CD_84E4 | 20210122 |
| S1A_IW_GRDH_1SDV_20210125T233514_20210125T233539_036301_04424C_FA13 | 20210125 |

|                                                                     |          |
|---------------------------------------------------------------------|----------|
| S1A_IW_GRDH_1SDV_20210125T233539_20210125T233604_036301_04424C_2AD5 | 20210125 |
| S1A_IW_GRDH_1SDV_20210127T231855_20210127T231920_036330_044351_ED39 | 20210127 |
| S1A_IW_GRDH_1SDV_20210127T231920_20210127T231945_036330_044351_8429 | 20210127 |
| S1A_IW_GRDH_1SDV_20210130T234323_20210130T234348_036374_0444CD_4EC0 | 20210130 |
| S1A_IW_GRDH_1SDV_20210130T234348_20210130T234413_036374_0444CD_1B13 | 20210130 |
| S1A_IW_GRDH_1SDV_20210201T232704_20210201T232729_036403_0445DA_9224 | 20210201 |
| S1A_IW_GRDH_1SDV_20210201T232729_20210201T232754_036403_0445DA_E0B8 | 20210201 |
| S1A_IW_GRDH_1SDV_20210203T231045_20210203T231110_036432_0446DB_EDD5 | 20210203 |
| S1A_IW_GRDH_1SDV_20210203T231110_20210203T231135_036432_0446DB_DE7F | 20210203 |
| S1A_IW_GRDH_1SDV_20210206T233514_20210206T233539_036476_044856_3749 | 20210206 |
| S1A_IW_GRDH_1SDV_20210206T233539_20210206T233604_036476_044856_1521 | 20210206 |
| S1A_IW_GRDH_1SDV_20210208T231855_20210208T231920_036505_044960_B994 | 20210208 |
| S1A_IW_GRDH_1SDV_20210208T231920_20210208T231945_036505_044960_6185 | 20210208 |
| S1A_IW_GRDH_1SDV_20210211T234323_20210211T234348_036549_044ADE_168C | 20210211 |
| S1A_IW_GRDH_1SDV_20210211T234348_20210211T234413_036549_044ADE_EA1C | 20210211 |
| S1A_IW_GRDH_1SDV_20210213T232704_20210213T232729_036578_044BF1_E349 | 20210213 |
| S1A_IW_GRDH_1SDV_20210213T232729_20210213T232754_036578_044BF1_7939 | 20210213 |
| S1A_IW_GRDH_1SDV_20210215T231045_20210215T231110_036607_044CF9_92EE | 20210215 |
| S1A_IW_GRDH_1SDV_20210215T231110_20210215T231135_036607_044CF9_CB22 | 20210215 |
| S1A_IW_GRDH_1SDV_20210218T233514_20210218T233539_036651_044E75_FA73 | 20210218 |
| S1A_IW_GRDH_1SDV_20210218T233539_20210218T233604_036651_044E75_44ED | 20210218 |
| S1A_IW_GRDH_1SDV_20210220T231855_20210220T231920_036680_044F7B_2E31 | 20210220 |

|                                                                     |          |
|---------------------------------------------------------------------|----------|
| S1A_IW_GRDH_1SDV_20210220T231920_20210220T231945_036680_044F7B_F7A3 | 20210220 |
| S1A_IW_GRDH_1SDV_20210223T234323_20210223T234348_036724_0450F8_A2D9 | 20210223 |
| S1A_IW_GRDH_1SDV_20210223T234348_20210223T234413_036724_0450F8_9488 | 20210223 |
| S1A_IW_GRDH_1SDV_20210225T232704_20210225T232729_036753_045204_9CAC | 20210225 |
| S1A_IW_GRDH_1SDV_20210225T232729_20210225T232754_036753_045204_8915 | 20210225 |
| S1A_IW_GRDH_1SDV_20210227T231045_20210227T231110_036782_045307_2C6D | 20210227 |
| S1A_IW_GRDH_1SDV_20210227T231110_20210227T231135_036782_045307_ECE1 | 20210227 |
| S1A_IW_GRDH_1SDV_20210302T233513_20210302T233538_036826_045484_1A3C | 20210302 |
| S1A_IW_GRDH_1SDV_20210304T231855_20210304T231920_036855_045586_3A38 | 20210304 |
| S1A_IW_GRDH_1SDV_20210304T231920_20210304T231945_036855_045586_3A3C | 20210304 |
| S1A_IW_GRDH_1SDV_20210307T234322_20210307T234347_036899_045714_1FA0 | 20210307 |
| S1A_IW_GRDH_1SDV_20210307T234347_20210307T234412_036899_045714_88E8 | 20210307 |
| S1A_IW_GRDH_1SDV_20210309T232704_20210309T232729_036928_045821_C63A | 20210309 |
| S1A_IW_GRDH_1SDV_20210309T232729_20210309T232754_036928_045821_0E41 | 20210309 |
| S1A_IW_GRDH_1SDV_20210311T231045_20210311T231110_036957_045920_02C8 | 20210311 |
| S1A_IW_GRDH_1SDV_20210311T231110_20210311T231135_036957_045920_CA62 | 20210311 |
| S1A_IW_GRDH_1SDV_20210314T233514_20210314T233539_037001_045AA1_0AE4 | 20210314 |
| S1A_IW_GRDH_1SDV_20210314T233539_20210314T233604_037001_045AA1_A384 | 20210314 |
| S1A_IW_GRDH_1SDV_20210316T231855_20210316T231920_037030_045BAA_C048 | 20210316 |
| S1A_IW_GRDH_1SDV_20210316T231920_20210316T231945_037030_045BAA_0BD5 | 20210316 |
| S1A_IW_GRDH_1SDV_20210319T234323_20210319T234348_037074_045D2F_63D1 | 20210319 |
| S1A_IW_GRDH_1SDV_20210319T234348_20210319T234413_037074_045D2F_5167 | 20210319 |



|                                                                     |          |
|---------------------------------------------------------------------|----------|
| S1A_IW_GRDH_1SDV_20210321T232704_20210321T232729_037103_045E3C_438A | 20210321 |
| S1A_IW_GRDH_1SDV_20210321T232729_20210321T232754_037103_045E3C_3243 | 20210321 |
| S1A_IW_GRDH_1SDV_20210323T231045_20210323T231110_037132_045F36_0222 | 20210323 |
| S1A_IW_GRDH_1SDV_20210323T231110_20210323T231135_037132_045F36_9073 | 20210323 |
| S1A_IW_GRDH_1SDV_20210326T233514_20210326T233539_037176_0460AE_C1FF | 20210326 |
| S1A_IW_GRDH_1SDV_20210326T233539_20210326T233604_037176_0460AE_B516 | 20210326 |
| S1A_IW_GRDH_1SDV_20210328T231855_20210328T231920_037205_0461B4_6473 | 20210328 |
| S1A_IW_GRDH_1SDV_20210328T231920_20210328T231945_037205_0461B4_41DB | 20210328 |
| S1A_IW_GRDH_1SDV_20210331T234323_20210331T234348_037249_046339_A0EA | 20210331 |
| S1A_IW_GRDH_1SDV_20210331T234348_20210331T234413_037249_046339_6F81 | 20210331 |
| S1A_IW_GRDH_1SDV_20210402T232704_20210402T232729_037278_046443_89FD | 20210402 |
| S1A_IW_GRDH_1SDV_20210402T232729_20210402T232754_037278_046443_DDDA | 20210402 |
| S1A_IW_GRDH_1SDV_20210404T231045_20210404T231110_037307_04653F_87C6 | 20210404 |
| S1A_IW_GRDH_1SDV_20210404T231110_20210404T231135_037307_04653F_7F56 | 20210404 |
| S1A_IW_GRDH_1SDV_20210407T233514_20210407T233539_037351_0466BC_15D7 | 20210407 |
| S1A_IW_GRDH_1SDV_20210407T233539_20210407T233604_037351_0466BC_21CB | 20210407 |
| S1A_IW_GRDH_1SDV_20210409T231855_20210409T231920_037380_0467BF_5B73 | 20210409 |
| S1A_IW_GRDH_1SDV_20210409T231920_20210409T231945_037380_0467BF_EF5E | 20210409 |
| S1A_IW_GRDH_1SDV_20210412T234323_20210412T234348_037424_046943_E002 | 20210412 |
| S1A_IW_GRDH_1SDV_20210412T234348_20210412T234413_037424_046943_2A56 | 20210412 |
| S1A_IW_GRDH_1SDV_20210414T232704_20210414T232729_037453_046A52_F692 | 20210414 |
| S1A_IW_GRDH_1SDV_20210414T232729_20210414T232754_037453_046A52_29FB | 20210414 |

|                                                                     |          |
|---------------------------------------------------------------------|----------|
| S1A_IW_GRDH_1SDV_20210416T231046_20210416T231111_037482_046B4C_9A5A | 20210416 |
| S1A_IW_GRDH_1SDV_20210416T231111_20210416T231136_037482_046B4C_40E3 | 20210416 |
| S1A_IW_GRDH_1SDV_20210419T233515_20210419T233540_037526_046CC8_F79E | 20210419 |
| S1A_IW_GRDH_1SDV_20210419T233540_20210419T233605_037526_046CC8_7E1B | 20210419 |
| S1A_IW_GRDH_1SDV_20210421T231856_20210421T231921_037555_046DD6_D7BA | 20210421 |
| S1A_IW_GRDH_1SDV_20210421T231921_20210421T231946_037555_046DD6_E3AD | 20210421 |
| S1A_IW_GRDH_1SDV_20210424T234324_20210424T234349_037599_046F4D_166B | 20210424 |
| S1A_IW_GRDH_1SDV_20210424T234349_20210424T234414_037599_046F4D_5DA2 | 20210424 |
| S1A_IW_GRDH_1SDV_20210426T232705_20210426T232730_037628_04705E_8006 | 20210426 |
| S1A_IW_GRDH_1SDV_20210426T232730_20210426T232755_037628_04705E_6E13 | 20210426 |
| S1A_IW_GRDH_1SDV_20210428T231046_20210428T231111_037657_047161_94ED | 20210428 |
| S1A_IW_GRDH_1SDV_20210428T231111_20210428T231136_037657_047161_103B | 20210428 |
| S1A_IW_GRDH_1SDV_20210501T233515_20210501T233540_037701_0472DC_B957 | 20210501 |
| S1A_IW_GRDH_1SDV_20210501T233540_20210501T233605_037701_0472DC_B1B2 | 20210501 |
| S1A_IW_GRDH_1SDV_20210503T231856_20210503T231921_037730_0473E7_1EC0 | 20210503 |
| S1A_IW_GRDH_1SDV_20210503T231921_20210503T231946_037730_0473E7_9F46 | 20210503 |
| S1A_IW_GRDH_1SDV_20210506T234324_20210506T234349_037774_047551_3891 | 20210506 |
| S1A_IW_GRDH_1SDV_20210506T234349_20210506T234414_037774_047551_20FA | 20210506 |
| S1A_IW_GRDH_1SDV_20210508T232706_20210508T232731_037803_047639_8536 | 20210508 |
| S1A_IW_GRDH_1SDV_20210508T232731_20210508T232756_037803_047639_E807 | 20210508 |
| S1A_IW_GRDH_1SDV_20210510T231047_20210510T231112_037832_04771A_EE86 | 20210510 |
| S1A_IW_GRDH_1SDV_20210510T231112_20210510T231137_037832_04771A_EED6 | 20210510 |

|                                                                 |         |
|-----------------------------------------------------------------|---------|
| S1A_IW_GRDH_1SDV_20210513T233516_20210513T233541_037876_04785F_ | 2021051 |
| CB5B                                                            | 3       |
| S1A_IW_GRDH_1SDV_20210513T233541_20210513T233606_037876_04785F_ | 2021051 |
| 0DFA                                                            | 3       |
| S1A_IW_GRDH_1SDV_20210515T231857_20210515T231922_037905_047939_ | 2021051 |
| F7FA                                                            | 5       |
| S1A_IW_GRDH_1SDV_20210515T231922_20210515T231947_037905_047939_ | 2021051 |
| E5EB                                                            | 5       |
| S1A_IW_GRDH_1SDV_20210518T234325_20210518T234350_037949_047A99_ | 2021051 |
| _92F7                                                           | 8       |
| S1A_IW_GRDH_1SDV_20210518T234350_20210518T234415_037949_047A99_ | 2021051 |
| _2175                                                           | 8       |
| S1A_IW_GRDH_1SDV_20210520T232706_20210520T232731_037978_047B84_ | 2021052 |
| 3093                                                            | 0       |
| S1A_IW_GRDH_1SDV_20210520T232731_20210520T232756_037978_047B84_ | 2021052 |
| E3F3                                                            | 0       |
| S1A_IW_GRDH_1SDV_20210522T231047_20210522T231112_038007_047C5F_ | 2021052 |
| _AEF4                                                           | 2       |
| S1A_IW_GRDH_1SDV_20210522T231112_20210522T231137_038007_047C5F_ | 2021052 |
| _7D40                                                           | 2       |
| S1A_IW_GRDH_1SDV_20210525T233516_20210525T233541_038051_047DAB_ | 2021052 |
| _A325                                                           | 5       |
| S1A_IW_GRDH_1SDV_20210525T233541_20210525T233606_038051_047DAB_ | 2021052 |
| _8D57                                                           | 5       |
| S1A_IW_GRDH_1SDV_20210527T231858_20210527T231923_038080_047E82_ | 2021052 |
| 8DB8                                                            | 7       |
| S1A_IW_GRDH_1SDV_20210527T231923_20210527T231948_038080_047E82_ | 2021052 |
| 9E6A                                                            | 7       |
| S1A_IW_GRDH_1SDV_20210601T232707_20210601T232732_038153_0480C7_ | 2021060 |
| 33E7                                                            | 1       |
| S1A_IW_GRDH_1SDV_20210601T232732_20210601T232757_038153_0480C7_ | 2021060 |
| 9A49                                                            | 1       |
| S1A_IW_GRDH_1SDV_20210603T231113_20210603T231138_038182_04819C_ | 2021060 |
| 1A5B                                                            | 3       |
| S1A_IW_GRDH_1SDV_20210606T233517_20210606T233542_038226_0482DF_ | 2021060 |
| _90EE                                                           | 6       |
| S1A_IW_GRDH_1SDV_20210606T233542_20210606T233607_038226_0482DF_ | 2021060 |
| _FFDC                                                           | 6       |
| S1A_IW_GRDH_1SDV_20210608T231858_20210608T231923_038255_0483B5_ | 2021060 |
| CDF0                                                            | 8       |
| S1A_IW_GRDH_1SDV_20210608T231923_20210608T231948_038255_0483B5_ | 2021060 |
| E3DA                                                            | 8       |
| S1A_IW_GRDH_1SDV_20210611T234326_20210611T234351_038299_04850A_ | 2021061 |
| _BFB1                                                           | 1       |

|                                                                     |          |
|---------------------------------------------------------------------|----------|
| S1A_IW_GRDH_1SDV_20210611T234351_20210611T234416_038299_04850A_CBDE | 20210611 |
| S1A_IW_GRDH_1SDV_20210613T232708_20210613T232733_038328_0485F6_1458 | 20210613 |
| S1A_IW_GRDH_1SDV_20210613T232733_20210613T232758_038328_0485F6_34D7 | 20210613 |
| S1A_IW_GRDH_1SDV_20210615T231049_20210615T231114_038357_0486D1_F1E6 | 20210615 |
| S1A_IW_GRDH_1SDV_20210615T231114_20210615T231139_038357_0486D1_1ACE | 20210615 |
| S1A_IW_GRDH_1SDV_20210618T233518_20210618T233543_038401_048813_88AB | 20210618 |
| S1A_IW_GRDH_1SDV_20210618T233543_20210618T233608_038401_048813_C687 | 20210618 |
| S1A_IW_GRDH_1SDV_20210620T231859_20210620T231924_038430_0488EB_E037 | 20210620 |
| S1A_IW_GRDH_1SDV_20210620T231924_20210620T231949_038430_0488EB_5266 | 20210620 |
| S1A_IW_GRDH_1SDV_20210623T234327_20210623T234352_038474_048A3F_495B | 20210623 |
| S1A_IW_GRDH_1SDV_20210623T234352_20210623T234417_038474_048A3F_4DAC | 20210623 |
| S1A_IW_GRDH_1SDV_20210625T232708_20210625T232733_038503_048B31_1C47 | 20210625 |
| S1A_IW_GRDH_1SDV_20210625T232733_20210625T232758_038503_048B31_6C63 | 20210625 |
| S1A_IW_GRDH_1SDV_20210627T231050_20210627T231115_038532_048C0F_EDD0 | 20210627 |
| S1A_IW_GRDH_1SDV_20210627T231115_20210627T231140_038532_048C0F_B50F | 20210627 |
| S1A_IW_GRDH_1SDV_20210630T233519_20210630T233544_038576_048D50_9E7A | 20210630 |
| S1A_IW_GRDH_1SDV_20210630T233544_20210630T233609_038576_048D50_5D1A | 20210630 |
| S1A_IW_GRDH_1SDV_20210702T231900_20210702T231925_038605_048E27_F77E | 20210702 |
| S1A_IW_GRDH_1SDV_20210702T231925_20210702T231950_038605_048E27_AC15 | 20210702 |
| S1A_IW_GRDH_1SDV_20210705T234328_20210705T234353_038649_048F89_2B02 | 20210705 |
| S1A_IW_GRDH_1SDV_20210705T234353_20210705T234418_038649_048F89_B9EC | 20210705 |
| S1A_IW_GRDH_1SDV_20210707T232709_20210707T232734_038678_049076_3DDA | 20210707 |

|                                                                     |          |
|---------------------------------------------------------------------|----------|
| S1A_IW_GRDH_1SDV_20210707T232734_20210707T232759_038678_049076_00AD | 20210707 |
| S1A_IW_GRDH_1SDV_20210709T231050_20210709T231115_038707_049150_74AF | 20210709 |
| S1A_IW_GRDH_1SDV_20210709T231115_20210709T231140_038707_049150_B939 | 20210709 |
| S1A_IW_GRDH_1SDV_20210712T233519_20210712T233544_038751_04929A_CD68 | 20210712 |
| S1A_IW_GRDH_1SDV_20210712T233544_20210712T233609_038751_04929A_2D94 | 20210712 |
| S1A_IW_GRDH_1SDV_20210714T231901_20210714T231926_038780_049372_FC16 | 20210714 |
| S1A_IW_GRDH_1SDV_20210714T231926_20210714T231951_038780_049372_8BDD | 20210714 |
| S1A_IW_GRDH_1SDV_20210717T234329_20210717T234354_038824_0494C7_222D | 20210717 |
| S1A_IW_GRDH_1SDV_20210717T234354_20210717T234419_038824_0494C7_DD8F | 20210717 |
| S1A_IW_GRDH_1SDV_20210719T232710_20210719T232735_038853_0495B4_A84F | 20210719 |
| S1A_IW_GRDH_1SDV_20210719T232735_20210719T232800_038853_0495B4_E081 | 20210719 |
| S1A_IW_GRDH_1SDV_20210721T231051_20210721T231116_038882_04968F_F99E | 20210721 |
| S1A_IW_GRDH_1SDV_20210721T231116_20210721T231141_038882_04968F_B5E5 | 20210721 |
| S1A_IW_GRDH_1SDV_20210726T231901_20210726T231926_038955_0498AD_166B | 20210726 |
| S1A_IW_GRDH_1SDV_20210726T231926_20210726T231951_038955_0498AD_ABE7 | 20210726 |
| S1A_IW_GRDH_1SDV_20210729T234329_20210729T234354_038999_0499FA_4361 | 20210729 |
| S1A_IW_GRDH_1SDV_20210729T234354_20210729T234419_038999_0499FA_7D6E | 20210729 |
| S1A_IW_GRDH_1SDV_20210731T232710_20210731T232735_039028_049AE7_2822 | 20210731 |
| S1A_IW_GRDH_1SDV_20210731T232735_20210731T232800_039028_049AE7_C5F5 | 20210731 |
| S1A_IW_GRDH_1SDV_20210802T231052_20210802T231117_039057_049BC0_B556 | 20210802 |
| S1A_IW_GRDH_1SDV_20210802T231117_20210802T231142_039057_049BC0_4EB6 | 20210802 |
| S1A_IW_GRDH_1SDV_20210805T233521_20210805T233546_039101_049D30_B705 | 20210805 |

|                                                                     |          |
|---------------------------------------------------------------------|----------|
| S1A_IW_GRDH_1SDV_20210805T233546_20210805T233611_039101_049D30_9DCE | 20210805 |
| S1A_IW_GRDH_1SDV_20210807T231902_20210807T231927_039130_049E34_08D6 | 20210807 |
| S1A_IW_GRDH_1SDV_20210807T231927_20210807T231952_039130_049E34_49C1 | 20210807 |
| S1A_IW_GRDH_1SDV_20210810T234330_20210810T234355_039174_049FB3_7124 | 20210810 |
| S1A_IW_GRDH_1SDV_20210810T234355_20210810T234420_039174_049FB3_C5F5 | 20210810 |
| S1A_IW_GRDH_1SDV_20210812T232711_20210812T232736_039203_04A0B8_FE56 | 20210812 |
| S1A_IW_GRDH_1SDV_20210812T232736_20210812T232801_039203_04A0B8_9155 | 20210812 |
| S1A_IW_GRDH_1SDV_20210814T231052_20210814T231117_039232_04A1BB_123F | 20210814 |
| S1A_IW_GRDH_1SDV_20210814T231117_20210814T231142_039232_04A1BB_A051 | 20210814 |
| S1A_IW_GRDH_1SDV_20210817T233521_20210817T233546_039276_04A340_C8F0 | 20210817 |
| S1A_IW_GRDH_1SDV_20210817T233546_20210817T233611_039276_04A340_C41E | 20210817 |
| S1A_IW_GRDH_1SDV_20210819T231903_20210819T231928_039305_04A43D_AC57 | 20210819 |
| S1A_IW_GRDH_1SDV_20210819T231928_20210819T231953_039305_04A43D_AAD9 | 20210819 |
| S1A_IW_GRDH_1SDV_20210822T234331_20210822T234356_039349_04A5B4_5B12 | 20210822 |
| S1A_IW_GRDH_1SDV_20210822T234356_20210822T234421_039349_04A5B4_542A | 20210822 |
| S1A_IW_GRDH_1SDV_20210824T232712_20210824T232737_039378_04A6BE_6030 | 20210824 |
| S1A_IW_GRDH_1SDV_20210824T232737_20210824T232802_039378_04A6BE_AA0C | 20210824 |
| S1A_IW_GRDH_1SDV_20210826T231053_20210826T231118_039407_04A7B5_CD92 | 20210826 |
| S1A_IW_GRDH_1SDV_20210826T231118_20210826T231143_039407_04A7B5_C1C7 | 20210826 |
| S1A_IW_GRDH_1SDV_20210829T233522_20210829T233547_039451_04A930_C697 | 20210829 |
| S1A_IW_GRDH_1SDV_20210829T233547_20210829T233612_039451_04A930_5CA8 | 20210829 |
| S1A_IW_GRDH_1SDV_20210831T231903_20210831T231928_039480_04AA38_42C7 | 20210831 |

|                                                                      |          |
|----------------------------------------------------------------------|----------|
| S1A_IW_GRDH_1SDV_20210831T231928_20210831T231953_039480_04AA38_8D39  | 20210831 |
| S1A_IW_GRDH_1SDV_20210903T234331_20210903T234356_039524_04ABB_B_1C3B | 20210903 |
| S1A_IW_GRDH_1SDV_20210903T234356_20210903T234421_039524_04ABB_B_B403 | 20210903 |
| S1A_IW_GRDH_1SDV_20210905T232712_20210905T232737_039553_04ACC7_97CB  | 20210905 |
| S1A_IW_GRDH_1SDV_20210905T232737_20210905T232802_039553_04ACC7_A984  | 20210905 |
| S1A_IW_GRDH_1SDV_20210907T231054_20210907T231119_039582_04ADC9_FC23  | 20210907 |
| S1A_IW_GRDH_1SDV_20210907T231119_20210907T231144_039582_04ADC9_BD04  | 20210907 |
| S1A_IW_GRDH_1SDV_20210910T233523_20210910T233548_039626_04AF45_2BC9  | 20210910 |
| S1A_IW_GRDH_1SDV_20210910T233548_20210910T233613_039626_04AF45_634A  | 20210910 |
| S1A_IW_GRDH_1SDV_20210912T231904_20210912T231929_039655_04B04A_71C5  | 20210912 |
| S1A_IW_GRDH_1SDV_20210912T231929_20210912T231954_039655_04B04A_4848  | 20210912 |
| S1A_IW_GRDH_1SDV_20210915T234332_20210915T234357_039699_04B1B4_EF66  | 20210915 |
| S1A_IW_GRDH_1SDV_20210915T234357_20210915T234422_039699_04B1B4_3002  | 20210915 |
| S1A_IW_GRDH_1SDV_20210917T232713_20210917T232738_039728_04B2BD_7FBE  | 20210917 |
| S1A_IW_GRDH_1SDV_20210917T232738_20210917T232803_039728_04B2BD_5A6F  | 20210917 |
| S1A_IW_GRDH_1SDV_20210919T231054_20210919T231119_039757_04B3B6_412B  | 20210919 |
| S1A_IW_GRDH_1SDV_20210919T231119_20210919T231144_039757_04B3B6_2DEA  | 20210919 |
| S1A_IW_GRDH_1SDV_20210922T233523_20210922T233548_039801_04B529_1828  | 20210922 |
| S1A_IW_GRDH_1SDV_20210922T233548_20210922T233613_039801_04B529_D7B3  | 20210922 |
| S1A_IW_GRDH_1SDV_20210924T231904_20210924T231929_039830_04B62B_5A53  | 20210924 |
| S1A_IW_GRDH_1SDV_20210924T231929_20210924T231954_039830_04B62B_56AE  | 20210924 |
| S1A_IW_GRDH_1SDV_20210927T234332_20210927T234357_039874_04B7B3_2EEC  | 20210927 |

|                                                                      |          |
|----------------------------------------------------------------------|----------|
| S1A_IW_GRDH_1SDV_20210927T234357_20210927T234422_039874_04B7B3_9380  | 20210927 |
| S1A_IW_GRDH_1SDV_20210929T232713_20210929T232738_039903_04B8C1_B8C4  | 20210929 |
| S1A_IW_GRDH_1SDV_20210929T232738_20210929T232803_039903_04B8C1_2976  | 20210929 |
| S1A_IW_GRDH_1SDV_20211001T231054_20211001T231119_039932_04B9BC_4317  | 20211001 |
| S1A_IW_GRDH_1SDV_20211001T231119_20211001T231144_039932_04B9BC_501D  | 20211001 |
| S1A_IW_GRDH_1SDV_20211004T233523_20211004T233548_039976_04BB47_3A7C  | 20211004 |
| S1A_IW_GRDH_1SDV_20211004T233548_20211004T233613_039976_04BB47_55E9  | 20211004 |
| S1A_IW_GRDH_1SDV_20211006T231904_20211006T231929_040005_04BC44_9E87  | 20211006 |
| S1A_IW_GRDH_1SDV_20211006T231929_20211006T231954_040005_04BC44_6A18  | 20211006 |
| S1A_IW_GRDH_1SDV_20211009T234332_20211009T234357_040049_04BDB_B_3C96 | 20211009 |
| S1A_IW_GRDH_1SDV_20211009T234357_20211009T234422_040049_04BDB_B_A567 | 20211009 |
| S1A_IW_GRDH_1SDV_20211011T232713_20211011T232738_040078_04BECB_8F0D  | 20211011 |
| S1A_IW_GRDH_1SDV_20211011T232738_20211011T232803_040078_04BECB_F59F  | 20211011 |
| S1A_IW_GRDH_1SDV_20211013T231054_20211013T231119_040107_04BFCE_2B39  | 20211013 |
| S1A_IW_GRDH_1SDV_20211013T231119_20211013T231144_040107_04BFCE_BA38  | 20211013 |
| S1A_IW_GRDH_1SDV_20211016T233523_20211016T233548_040151_04C153_76FE  | 20211016 |
| S1A_IW_GRDH_1SDV_20211016T233548_20211016T233613_040151_04C153_B495  | 20211016 |
| S1A_IW_GRDH_1SDV_20211018T231904_20211018T231929_040180_04C25C_F877  | 20211018 |
| S1A_IW_GRDH_1SDV_20211018T231929_20211018T231954_040180_04C25C_8C83  | 20211018 |
| S1A_IW_GRDH_1SDV_20211021T234332_20211021T234357_040224_04C3D5_9D1A  | 20211021 |
| S1A_IW_GRDH_1SDV_20211021T234357_20211021T234422_040224_04C3D5_OF35  | 20211021 |
| S1A_IW_GRDH_1SDV_20211023T232713_20211023T232738_040253_04C4E5_419C  | 20211023 |



|                                                                 |         |
|-----------------------------------------------------------------|---------|
| S1A_IW_GRDH_1SDV_20211023T232738_20211023T232803_040253_04C4E5  | 2021102 |
| _CF6C                                                           | 3       |
| S1A_IW_GRDH_1SDV_20211025T231054_20211025T231119_040282_04C5E5  | 2021102 |
| _96F5                                                           | 5       |
| S1A_IW_GRDH_1SDV_20211025T231119_20211025T231144_040282_04C5E5  | 2021102 |
| _0AEA                                                           | 5       |
| S1A_IW_GRDH_1SDV_20211028T233523_20211028T233548_040326_04C767_ | 2021102 |
| E7F6                                                            | 8       |
| S1A_IW_GRDH_1SDV_20211028T233548_20211028T233613_040326_04C767_ | 2021102 |
| 5403                                                            | 8       |
| S1A_IW_GRDH_1SDV_20211030T231904_20211030T231929_040355_04C86D  | 2021103 |
| _1AC5                                                           | 0       |
| S1A_IW_GRDH_1SDV_20211030T231929_20211030T231954_040355_04C86D  | 2021103 |
| _F991                                                           | 0       |
| S1A_IW_GRDH_1SDV_20211102T234332_20211102T234357_040399_04C9EC  | 2021110 |
| _C624                                                           | 2       |
| S1A_IW_GRDH_1SDV_20211102T234357_20211102T234422_040399_04C9EC  | 2021110 |
| _5BFE                                                           | 2       |
| S1A_IW_GRDH_1SDV_20211109T233523_20211109T233548_040501_04CD86  | 2021110 |
| _0758                                                           | 9       |
| S1A_IW_GRDH_1SDV_20211109T233548_20211109T233613_040501_04CD86  | 2021110 |
| _167F                                                           | 9       |
| S1A_IW_GRDH_1SDV_20211111T231904_20211111T231929_040530_04CE84  | 2021111 |
| _A2F3                                                           | 1       |
| S1A_IW_GRDH_1SDV_20211111T231929_20211111T231954_040530_04CE84  | 2021111 |
| _6ABA                                                           | 1       |
| S1A_IW_GRDH_1SDV_20211114T234332_20211114T234357_040574_04D009  | 2021111 |
| _A793                                                           | 4       |
| S1A_IW_GRDH_1SDV_20211114T234357_20211114T234422_040574_04D009  | 2021111 |
| _D232                                                           | 4       |
| S1A_IW_GRDH_1SDV_20211116T232713_20211116T232738_040603_04D112  | 2021111 |
| _C011                                                           | 6       |
| S1A_IW_GRDH_1SDV_20211116T232738_20211116T232803_040603_04D112  | 2021111 |
| _115C                                                           | 6       |
| S1A_IW_GRDH_1SDV_20211118T231054_20211118T231119_040632_04D206  | 2021111 |
| _B834                                                           | 8       |
| S1A_IW_GRDH_1SDV_20211118T231119_20211118T231144_040632_04D206  | 2021111 |
| _5790                                                           | 8       |
| S1A_IW_GRDH_1SDV_20211121T233523_20211121T233548_040676_04D38B  | 2021112 |
| _0862                                                           | 1       |
| S1A_IW_GRDH_1SDV_20211121T233548_20211121T233613_040676_04D38B  | 2021112 |
| _68FE                                                           | 1       |
| S1A_IW_GRDH_1SDV_20211123T231904_20211123T231929_040705_04D48F  | 2021112 |
| _017E                                                           | 3       |

|                                                                      |          |
|----------------------------------------------------------------------|----------|
| S1A_IW_GRDH_1SDV_20211123T231929_20211123T231954_040705_04D48F_5FAC  | 20211123 |
| S1A_IW_GRDH_1SDV_20211126T234331_20211126T234356_040749_04D60A_90E0  | 20211126 |
| S1A_IW_GRDH_1SDV_20211126T234356_20211126T234421_040749_04D60A_28DE  | 20211126 |
| S1A_IW_GRDH_1SDV_20211128T232712_20211128T232737_040778_04D71C_3278  | 20211128 |
| S1A_IW_GRDH_1SDV_20211128T232737_20211128T232802_040778_04D71C_A936  | 20211128 |
| S1A_IW_GRDH_1SDV_20211130T231053_20211130T231118_040807_04D821_A830  | 20211130 |
| S1A_IW_GRDH_1SDV_20211130T231118_20211130T231143_040807_04D821_2892  | 20211130 |
| S1A_IW_GRDH_1SDV_20211203T233522_20211203T233547_040851_04D9A7_2446  | 20211203 |
| S1A_IW_GRDH_1SDV_20211203T233547_20211203T233612_040851_04D9A7_F9B2  | 20211203 |
| S1A_IW_GRDH_1SDV_20211205T231903_20211205T231928_040880_04DAA_C_87FC | 20211205 |
| S1A_IW_GRDH_1SDV_20211205T231928_20211205T231953_040880_04DAA_C_97C8 | 20211205 |
| S1A_IW_GRDH_1SDV_20211208T234331_20211208T234356_040924_04DC23_1CA5  | 20211208 |
| S1A_IW_GRDH_1SDV_20211208T234356_20211208T234421_040924_04DC23_F95A  | 20211208 |
| S1A_IW_GRDH_1SDV_20211210T232712_20211210T232737_040953_04DD2C_63EF  | 20211210 |
| S1A_IW_GRDH_1SDV_20211210T232737_20211210T232802_040953_04DD2C_C98E  | 20211210 |
| S1A_IW_GRDH_1SDV_20211212T231053_20211212T231118_040982_04DE2E_B469  | 20211212 |
| S1A_IW_GRDH_1SDV_20211212T231118_20211212T231143_040982_04DE2E_E97C  | 20211212 |
| S1A_IW_GRDH_1SDV_20211215T233522_20211215T233547_041026_04DFA2_B584  | 20211215 |
| S1A_IW_GRDH_1SDV_20211215T233547_20211215T233612_041026_04DFA2_2409  | 20211215 |
| S1A_IW_GRDH_1SDV_20211217T231903_20211217T231928_041055_04E09B_3361  | 20211217 |
| S1A_IW_GRDH_1SDV_20211217T231928_20211217T231953_041055_04E09B_105A  | 20211217 |
| S1A_IW_GRDH_1SDV_20211220T234330_20211220T234355_041099_04E1FB_8A88  | 20211220 |

|                                                                     |          |
|---------------------------------------------------------------------|----------|
| S1A_IW_GRDH_1SDV_20211220T234355_20211220T234420_041099_04E1FB_9AE8 | 20211220 |
| S1A_IW_GRDH_1SDV_20211222T232711_20211222T232736_041128_04E303_78BE | 20211222 |
| S1A_IW_GRDH_1SDV_20211222T232736_20211222T232801_041128_04E303_3202 | 20211222 |
| S1A_IW_GRDH_1SDV_20211227T233521_20211227T233546_041201_04E568_E10D | 20211227 |
| S1A_IW_GRDH_1SDV_20211227T233546_20211227T233611_041201_04E568_B4B5 | 20211227 |
| S1A_IW_GRDH_1SDV_20211229T231902_20211229T231927_041230_04E66A_0659 | 20211229 |
| S1A_IW_GRDH_1SDV_20211229T231927_20211229T231952_041230_04E66A_D440 | 20211229 |
| S1A_IW_GRDH_1SDV_20210101T113527_20210101T113552_035944_0435CA_3480 | 20210101 |
| S1A_IW_GRDH_1SDV_20210101T113552_20210101T113617_035944_0435CA_C990 | 20210101 |
| S1A_IW_GRDH_1SDV_20210101T113617_20210101T113642_035944_0435CA_D9DA | 20210101 |
| S1A_IW_GRDH_1SDV_20210103T111905_20210103T111930_035973_0436D9_1C3E | 20210103 |
| S1A_IW_GRDH_1SDV_20210103T111930_20210103T111955_035973_0436D9_B4B3 | 20210103 |
| S1A_IW_GRDH_1SDV_20210103T111955_20210103T112020_035973_0436D9_A016 | 20210103 |
| S1A_IW_GRDH_1SDV_20210105T110229_20210105T110254_036002_0437C1_00F3 | 20210105 |
| S1A_IW_GRDH_1SDV_20210105T110254_20210105T110319_036002_0437C1_1EE6 | 20210105 |
| S1A_IW_GRDH_1SDV_20210106T114402_20210106T114427_036017_04385B_3EB8 | 20210106 |
| S1A_IW_GRDH_1SDV_20210108T112726_20210108T112751_036046_043961_E75D | 20210108 |
| S1A_IW_GRDH_1SDV_20210108T112751_20210108T112816_036046_043961_211B | 20210108 |
| S1A_IW_GRDH_1SDV_20210110T111029_20210110T111054_036075_043A78_F30E | 20210110 |
| S1A_IW_GRDH_1SDV_20210110T111054_20210110T111119_036075_043A78_8AD9 | 20210110 |
| S1A_IW_GRDH_1SDV_20210110T111119_20210110T111144_036075_043A78_492F | 20210110 |
| S1A_IW_GRDH_1SDV_20210113T113527_20210113T113552_036119_043BFB_1F80 | 20210113 |

|                                                                     |          |
|---------------------------------------------------------------------|----------|
| S1A_IW_GRDH_1SDV_20210113T113552_20210113T113617_036119_043BFB_A2F0 | 20210113 |
| S1A_IW_GRDH_1SDV_20210113T113617_20210113T113642_036119_043BFB_6113 | 20210113 |
| S1A_IW_GRDH_1SDV_20210115T111904_20210115T111929_036148_043CFD_FD8C | 20210115 |
| S1A_IW_GRDH_1SDV_20210115T111929_20210115T111954_036148_043CFD_40C6 | 20210115 |
| S1A_IW_GRDH_1SDV_20210115T111954_20210115T112019_036148_043CFD_466E | 20210115 |
| S1A_IW_GRDH_1SDV_20210117T110228_20210117T110253_036177_043DE3_C68B | 20210117 |
| S1A_IW_GRDH_1SDV_20210117T110253_20210117T110318_036177_043DE3_D94D | 20210117 |
| S1A_IW_GRDH_1SDV_20210118T114401_20210118T114426_036192_043E7F_1131 | 20210118 |
| S1A_IW_GRDH_1SDV_20210120T112726_20210120T112751_036221_043F89_C21A | 20210120 |
| S1A_IW_GRDH_1SDV_20210120T112751_20210120T112816_036221_043F89_9E47 | 20210120 |
| S1A_IW_GRDH_1SDV_20210122T111029_20210122T111054_036250_044093_A04C | 20210122 |
| S1A_IW_GRDH_1SDV_20210122T111054_20210122T111119_036250_044093_86C1 | 20210122 |
| S1A_IW_GRDH_1SDV_20210122T111119_20210122T111144_036250_044093_93DF | 20210122 |
| S1A_IW_GRDH_1SDV_20210125T113526_20210125T113551_036294_04420A_2247 | 20210125 |
| S1A_IW_GRDH_1SDV_20210125T113551_20210125T113616_036294_04420A_217A | 20210125 |
| S1A_IW_GRDH_1SDV_20210125T113616_20210125T113641_036294_04420A_5C4A | 20210125 |
| S1A_IW_GRDH_1SDV_20210127T111904_20210127T111929_036323_044314_E911 | 20210127 |
| S1A_IW_GRDH_1SDV_20210127T111929_20210127T111954_036323_044314_0A65 | 20210127 |
| S1A_IW_GRDH_1SDV_20210127T111954_20210127T112019_036323_044314_8C15 | 20210127 |
| S1A_IW_GRDH_1SDV_20210129T110228_20210129T110253_036352_044401_BC7D | 20210129 |
| S1A_IW_GRDH_1SDV_20210129T110253_20210129T110318_036352_044401_F672 | 20210129 |
| S1A_IW_GRDH_1SDV_20210130T114401_20210130T114426_036367_044493_1BC4 | 20210130 |

|                                                                     |          |
|---------------------------------------------------------------------|----------|
| S1A_IW_GRDH_1SDV_20210201T112725_20210201T112750_036396_044596_603D | 20210201 |
| S1A_IW_GRDH_1SDV_20210201T112750_20210201T112815_036396_044596_0D00 | 20210201 |
| S1A_IW_GRDH_1SDV_20210203T111028_20210203T111053_036425_0446A2_289E | 20210203 |
| S1A_IW_GRDH_1SDV_20210203T111053_20210203T111118_036425_0446A2_B46A | 20210203 |
| S1A_IW_GRDH_1SDV_20210203T111118_20210203T111143_036425_0446A2_AC83 | 20210203 |
| S1A_IW_GRDH_1SDV_20210206T113526_20210206T113551_036469_044816_08D7 | 20210206 |
| S1A_IW_GRDH_1SDV_20210206T113551_20210206T113616_036469_044816_167D | 20210206 |
| S1A_IW_GRDH_1SDV_20210206T113616_20210206T113641_036469_044816_6826 | 20210206 |
| S1A_IW_GRDH_1SDV_20210208T111903_20210208T111928_036498_044922_9956 | 20210208 |
| S1A_IW_GRDH_1SDV_20210208T111928_20210208T111953_036498_044922_E59F | 20210208 |
| S1A_IW_GRDH_1SDV_20210208T111953_20210208T112018_036498_044922_F2EA | 20210208 |
| S1A_IW_GRDH_1SDV_20210210T110228_20210210T110253_036527_044A16_D671 | 20210210 |
| S1A_IW_GRDH_1SDV_20210210T110253_20210210T110318_036527_044A16_1F2D | 20210210 |
| S1A_IW_GRDH_1SDV_20210211T114401_20210211T114426_036542_044AA0_9C7F | 20210211 |
| S1A_IW_GRDH_1SDV_20210213T112725_20210213T112750_036571_044BAA_76B3 | 20210213 |
| S1A_IW_GRDH_1SDV_20210213T112750_20210213T112815_036571_044BAA_8BFA | 20210213 |
| S1A_IW_GRDH_1SDV_20210215T111028_20210215T111053_036600_044CC1_4821 | 20210215 |
| S1A_IW_GRDH_1SDV_20210215T111053_20210215T111118_036600_044CC1_C88C | 20210215 |
| S1A_IW_GRDH_1SDV_20210215T111118_20210215T111143_036600_044CC1_3F8D | 20210215 |
| S1A_IW_GRDH_1SDV_20210218T113525_20210218T113550_036644_044E33_44D4 | 20210218 |
| S1A_IW_GRDH_1SDV_20210218T113550_20210218T113615_036644_044E33_F7E2 | 20210218 |
| S1A_IW_GRDH_1SDV_20210218T113615_20210218T113640_036644_044E33_6EB9 | 20210218 |

|                                                                     |          |
|---------------------------------------------------------------------|----------|
| S1A_IW_GRDH_1SDV_20210222T110227_20210222T110252_036702_045031_449E | 20210222 |
| S1A_IW_GRDH_1SDV_20210222T110252_20210222T110317_036702_045031_686D | 20210222 |
| S1A_IW_GRDH_1SDV_20210225T112725_20210225T112750_036746_0451BD_7D96 | 20210222 |
| S1A_IW_GRDH_1SDV_20210225T112750_20210225T112815_036746_0451BD_5DEE | 20210222 |
| S1A_IW_GRDH_1SDV_20210227T111028_20210227T111053_036775_0452CE_B6EE | 20210222 |
| S1A_IW_GRDH_1SDV_20210227T111053_20210227T111118_036775_0452CE_EC65 | 20210222 |
| S1A_IW_GRDH_1SDV_20210227T111118_20210227T111143_036775_0452CE_FEA7 | 20210222 |
| S1A_IW_GRDH_1SDV_20210306T110227_20210306T110252_036877_045643_19EA | 20210306 |
| S1A_IW_GRDH_1SDV_20210306T110252_20210306T110317_036877_045643_353E | 20210306 |
| S1A_IW_GRDH_1SDV_20210311T111028_20210311T111053_036950_0458E7_2C34 | 20210311 |
| S1A_IW_GRDH_1SDV_20210311T111053_20210311T111118_036950_0458E7_BAA3 | 20210311 |
| S1A_IW_GRDH_1SDV_20210311T111118_20210311T111143_036950_0458E7_34F6 | 20210311 |
| S1A_IW_GRDH_1SDV_20210314T113525_20210314T113550_036994_045A64_E0BA | 20210314 |
| S1A_IW_GRDH_1SDV_20210314T113550_20210314T113615_036994_045A64_F460 | 20210314 |
| S1A_IW_GRDH_1SDV_20210314T113615_20210314T113640_036994_045A64_475A | 20210314 |
| S1A_IW_GRDH_1SDV_20210318T110227_20210318T110252_037052_045C5D_51BF | 20210318 |
| S1A_IW_GRDH_1SDV_20210318T110252_20210318T110317_037052_045C5D_DEFE | 20210318 |
| S1A_IW_GRDH_1SDV_20210319T114400_20210319T114425_037067_045CF2_4A6E | 20210319 |
| S1A_IW_GRDH_1SDV_20210323T111028_20210323T111053_037125_045EFE_1A5D | 20210323 |
| S1A_IW_GRDH_1SDV_20210323T111053_20210323T111118_037125_045EFE_1D1D | 20210323 |
| S1A_IW_GRDH_1SDV_20210323T111118_20210323T111143_037125_045EFE_C19C | 20210323 |
| S1A_IW_GRDH_1SDV_20210326T113526_20210326T113551_037169_04606D_2A83 | 20210326 |

|                                                                     |          |
|---------------------------------------------------------------------|----------|
| S1A_IW_GRDH_1SDV_20210326T113551_20210326T113616_037169_04606D_E816 | 20210326 |
| S1A_IW_GRDH_1SDV_20210326T113616_20210326T113641_037169_04606D_2823 | 20210326 |
| S1A_IW_GRDH_1SDV_20210330T110228_20210330T110253_037227_04626B_CB23 | 20210330 |
| S1A_IW_GRDH_1SDV_20210330T110253_20210330T110318_037227_04626B_6A2A | 20210330 |
| S1A_IW_GRDH_1SDV_20210331T114400_20210331T114425_037242_0462FE_2E98 | 20210331 |
| S1A_IW_GRDH_1SDV_20210402T112725_20210402T112750_037271_046403_7340 | 20210402 |
| S1A_IW_GRDH_1SDV_20210402T112750_20210402T112815_037271_046403_4EE1 | 20210402 |
| S1A_IW_GRDH_1SDV_20210404T111028_20210404T111053_037300_046507_46AE | 20210404 |
| S1A_IW_GRDH_1SDV_20210404T111053_20210404T111118_037300_046507_F402 | 20210404 |
| S1A_IW_GRDH_1SDV_20210404T111118_20210404T111143_037300_046507_A57B | 20210404 |
| S1A_IW_GRDH_1SDV_20210407T113526_20210407T113551_037344_04667D_121E | 20210407 |
| S1A_IW_GRDH_1SDV_20210407T113551_20210407T113616_037344_04667D_CC34 | 20210407 |
| S1A_IW_GRDH_1SDV_20210407T113616_20210407T113641_037344_04667D_E6B0 | 20210407 |
| S1A_IW_GRDH_1SDV_20210411T110228_20210411T110253_037402_046875_2A25 | 20210411 |
| S1A_IW_GRDH_1SDV_20210411T110253_20210411T110318_037402_046875_D040 | 20210411 |
| S1A_IW_GRDH_1SDV_20210412T114401_20210412T114426_037417_046908_3729 | 20210412 |
| S1A_IW_GRDH_1SDV_20210414T112726_20210414T112751_037446_046A11_3DFC | 20210414 |
| S1A_IW_GRDH_1SDV_20210414T112751_20210414T112816_037446_046A11_07BB | 20210414 |
| S1A_IW_GRDH_1SDV_20210416T111029_20210416T111054_037475_046B14_F09D | 20210416 |
| S1A_IW_GRDH_1SDV_20210416T111054_20210416T111119_037475_046B14_263A | 20210416 |
| S1A_IW_GRDH_1SDV_20210416T111119_20210416T111144_037475_046B14_4A25 | 20210416 |
| S1A_IW_GRDH_1SDV_20210419T113527_20210419T113552_037519_046C88_75E9 | 20210419 |

|                                                                     |          |
|---------------------------------------------------------------------|----------|
| S1A_IW_GRDH_1SDV_20210419T113552_20210419T113617_037519_046C88_5D74 | 20210419 |
| S1A_IW_GRDH_1SDV_20210419T113617_20210419T113642_037519_046C88_6127 | 20210419 |
| S1A_IW_GRDH_1SDV_20210423T110229_20210423T110254_037577_046E82_248B | 20210423 |
| S1A_IW_GRDH_1SDV_20210423T110254_20210423T110319_037577_046E82_8910 | 20210423 |
| S1A_IW_GRDH_1SDV_20210424T114402_20210424T114427_037592_046F11_525E | 20210424 |
| S1A_IW_GRDH_1SDV_20210426T112726_20210426T112751_037621_047019_BD60 | 20210426 |
| S1A_IW_GRDH_1SDV_20210426T112751_20210426T112816_037621_047019_24BD | 20210426 |
| S1A_IW_GRDH_1SDV_20210428T111029_20210428T111054_037650_047125_F036 | 20210428 |
| S1A_IW_GRDH_1SDV_20210428T111054_20210428T111119_037650_047125_7B96 | 20210428 |
| S1A_IW_GRDH_1SDV_20210428T111119_20210428T111144_037650_047125_374A | 20210428 |
| S1A_IW_GRDH_1SDV_20210501T113527_20210501T113552_037694_04729A_922F | 20210501 |
| S1A_IW_GRDH_1SDV_20210501T113552_20210501T113617_037694_04729A_F311 | 20210501 |
| S1A_IW_GRDH_1SDV_20210501T113617_20210501T113642_037694_04729A_671A | 20210501 |
| S1A_IW_GRDH_1SDV_20210508T112727_20210508T112752_037796_047601_8A6A | 20210508 |
| S1A_IW_GRDH_1SDV_20210508T112752_20210508T112817_037796_047601_8CB4 | 20210508 |
| S1A_IW_GRDH_1SDV_20210513T113528_20210513T113553_037869_04782B_B568 | 20210513 |
| S1A_IW_GRDH_1SDV_20210513T113553_20210513T113618_037869_04782B_E722 | 20210513 |
| S1A_IW_GRDH_1SDV_20210513T113618_20210513T113643_037869_04782B_4F55 | 20210513 |
| S1A_IW_GRDH_1SDV_20210515T111905_20210515T111930_037898_047906_6AD7 | 20210515 |
| S1A_IW_GRDH_1SDV_20210515T111930_20210515T111955_037898_047906_D5B5 | 20210515 |
| S1A_IW_GRDH_1SDV_20210515T111955_20210515T112020_037898_047906_7A81 | 20210515 |
| S1A_IW_GRDH_1SDV_20210518T114403_20210518T114428_037942_047A5D_E1AC | 20210518 |



|                                                                     |          |
|---------------------------------------------------------------------|----------|
| S1A_IW_GRDH_1SDV_20210520T112727_20210520T112752_037971_047B4F_E560 | 20210520 |
| S1A_IW_GRDH_1SDV_20210520T112752_20210520T112817_037971_047B4F_3626 | 20210520 |
| S1A_IW_GRDH_1SDV_20210522T111031_20210522T111056_038000_047C2F_B4CA | 20210522 |
| S1A_IW_GRDH_1SDV_20210522T111056_20210522T111121_038000_047C2F_BFE6 | 20210522 |
| S1A_IW_GRDH_1SDV_20210522T111121_20210522T111146_038000_047C2F_DF76 | 20210522 |
| S1A_IW_GRDH_1SDV_20210525T113528_20210525T113553_038044_047D75_D5AD | 20210525 |
| S1A_IW_GRDH_1SDV_20210525T113553_20210525T113618_038044_047D75_E160 | 20210525 |
| S1A_IW_GRDH_1SDV_20210525T113618_20210525T113643_038044_047D75_44E1 | 20210525 |
| S1A_IW_GRDH_1SDV_20210527T111906_20210527T111931_038073_047E4F_EA81 | 20210527 |
| S1A_IW_GRDH_1SDV_20210527T111931_20210527T111956_038073_047E4F_3C8C | 20210527 |
| S1A_IW_GRDH_1SDV_20210527T111956_20210527T112021_038073_047E4F_E499 | 20210527 |
| S1A_IW_GRDH_1SDV_20210529T110230_20210529T110255_038102_047F2B_032F | 20210529 |
| S1A_IW_GRDH_1SDV_20210529T110255_20210529T110320_038102_047F2B_F0F2 | 20210529 |
| S1A_IW_GRDH_1SDV_20210530T114403_20210530T114428_038117_047F9F_90BD | 20210530 |
| S1A_IW_GRDH_1SDV_20210603T111031_20210603T111056_038175_04816B_8B06 | 20210603 |
| S1A_IW_GRDH_1SDV_20210603T111056_20210603T111121_038175_04816B_62CE | 20210603 |
| S1A_IW_GRDH_1SDV_20210603T111121_20210603T111146_038175_04816B_A5F7 | 20210603 |
| S1A_IW_GRDH_1SDV_20210608T111907_20210608T111932_038248_048382_678E | 20210608 |
| S1A_IW_GRDH_1SDV_20210608T111932_20210608T111957_038248_048382_F50F | 20210608 |
| S1A_IW_GRDH_1SDV_20210608T111957_20210608T112022_038248_048382_DA34 | 20210608 |
| S1A_IW_GRDH_1SDV_20210610T110231_20210610T110256_038277_048454_C458 | 20210610 |
| S1A_IW_GRDH_1SDV_20210610T110256_20210610T110321_038277_048454_38A6 | 20210610 |

|                                                                     |          |
|---------------------------------------------------------------------|----------|
| S1A_IW_GRDH_1SDV_20210611T114404_20210611T114429_038292_0484CF_DF8E | 20210611 |
| S1A_IW_GRDH_1SDV_20210615T111032_20210615T111057_038350_0486A0_1A6A | 20210615 |
| S1A_IW_GRDH_1SDV_20210615T111057_20210615T111122_038350_0486A0_716C | 20210615 |
| S1A_IW_GRDH_1SDV_20210615T111122_20210615T111147_038350_0486A0_BC7F | 20210615 |
| S1A_IW_GRDH_1SDV_20210620T111908_20210620T111933_038423_0488B8_B9D0 | 20210620 |
| S1A_IW_GRDH_1SDV_20210620T111933_20210620T111958_038423_0488B8_BFC4 | 20210620 |
| S1A_IW_GRDH_1SDV_20210620T111958_20210620T112023_038423_0488B8_44E3 | 20210620 |
| S1A_IW_GRDH_1SDV_20210627T111033_20210627T111058_038525_048BDD_6F52 | 20210627 |
| S1A_IW_GRDH_1SDV_20210627T111058_20210627T111123_038525_048BDD_4C69 | 20210627 |
| S1A_IW_GRDH_1SDV_20210627T111123_20210627T111148_038525_048BDD_8737 | 20210627 |
| S1A_IW_GRDH_1SDV_20210702T111908_20210702T111933_038598_048DF3_44EC | 20210702 |
| S1A_IW_GRDH_1SDV_20210702T111933_20210702T111958_038598_048DF3_071D | 20210702 |
| S1A_IW_GRDH_1SDV_20210702T111958_20210702T112023_038598_048DF3_D9A9 | 20210702 |
| S1A_IW_GRDH_1SDV_20210709T111033_20210709T111058_038700_04911E_3184 | 20210709 |
| S1A_IW_GRDH_1SDV_20210709T111058_20210709T111123_038700_04911E_2795 | 20210709 |
| S1A_IW_GRDH_1SDV_20210709T111123_20210709T111148_038700_04911E_A8E7 | 20210709 |
| S1A_IW_GRDH_1SDV_20210714T111909_20210714T111934_038773_049340_C55A | 20210714 |
| S1A_IW_GRDH_1SDV_20210714T111934_20210714T111959_038773_049340_1E33 | 20210714 |
| S1A_IW_GRDH_1SDV_20210714T111959_20210714T112024_038773_049340_BBC4 | 20210714 |
| S1A_IW_GRDH_1SDV_20210716T110233_20210716T110258_038802_049413_B610 | 20210716 |
| S1A_IW_GRDH_1SDV_20210716T110258_20210716T110323_038802_049413_3C5B | 20210716 |
| S1A_IW_GRDH_1SDV_20210721T111034_20210721T111059_038875_04965F_A143 | 20210721 |

|                                                                     |          |
|---------------------------------------------------------------------|----------|
| S1A_IW_GRDH_1SDV_20210721T111059_20210721T111124_038875_04965F_497B | 20210721 |
| S1A_IW_GRDH_1SDV_20210721T111124_20210721T111149_038875_04965F_4BA4 | 20210721 |
| S1A_IW_GRDH_1SDV_20210726T111910_20210726T111935_038948_04987E_8C40 | 20210726 |
| S1A_IW_GRDH_1SDV_20210726T111935_20210726T112000_038948_04987E_C094 | 20210726 |
| S1A_IW_GRDH_1SDV_20210726T112000_20210726T112025_038948_04987E_099F | 20210726 |
| S1A_IW_GRDH_1SDV_20210728T110234_20210728T110259_038977_04994C_515F | 20210728 |
| S1A_IW_GRDH_1SDV_20210728T110259_20210728T110324_038977_04994C_5EC5 | 20210728 |
| S1A_IW_GRDH_1SDV_20210729T114407_20210729T114432_038992_0499BC_6E5A | 20210729 |
| S1A_IW_GRDH_1SDV_20210802T111035_20210802T111100_039050_049B8F_88EC | 20210802 |
| S1A_IW_GRDH_1SDV_20210802T111100_20210802T111125_039050_049B8F_079E | 20210802 |
| S1A_IW_GRDH_1SDV_20210802T111125_20210802T111150_039050_049B8F_814B | 20210802 |
| S1A_IW_GRDH_1SDV_20210805T113533_20210805T113558_039094_049CED_0E1C | 20210805 |
| S1A_IW_GRDH_1SDV_20210805T113558_20210805T113623_039094_049CED_9993 | 20210805 |
| S1A_IW_GRDH_1SDV_20210805T113623_20210805T113648_039094_049CED_947B | 20210805 |
| S1A_IW_GRDH_1SDV_20210807T111910_20210807T111935_039123_049DF7_70DF | 20210807 |
| S1A_IW_GRDH_1SDV_20210807T111935_20210807T112000_039123_049DF7_6D0B | 20210807 |
| S1A_IW_GRDH_1SDV_20210807T112000_20210807T112025_039123_049DF7_471F | 20210807 |
| S1A_IW_GRDH_1SDV_20210809T110235_20210809T110300_039152_049EEB_AA3C | 20210809 |
| S1A_IW_GRDH_1SDV_20210809T110300_20210809T110325_039152_049EEB_4F9F | 20210809 |
| S1A_IW_GRDH_1SDV_20210810T114408_20210810T114433_039167_049F7A_16B7 | 20210810 |
| S1A_IW_GRDH_1SDV_20210812T112732_20210812T112757_039196_04A073_2BC9 | 20210812 |
| S1A_IW_GRDH_1SDV_20210812T112757_20210812T112822_039196_04A073_709B | 20210812 |

|                                                                     |          |
|---------------------------------------------------------------------|----------|
| S1A_IW_GRDH_1SDV_20210814T111036_20210814T111101_039225_04A183_BCE8 | 20210814 |
| S1A_IW_GRDH_1SDV_20210814T111101_20210814T111126_039225_04A183_1B4C | 20210814 |
| S1A_IW_GRDH_1SDV_20210814T111126_20210814T111151_039225_04A183_3007 | 20210814 |
| S1A_IW_GRDH_1SDV_20210817T113533_20210817T113558_039269_04A2FD_0BB7 | 20210817 |
| S1A_IW_GRDH_1SDV_20210817T113558_20210817T113623_039269_04A2FD_7D5A | 20210817 |
| S1A_IW_GRDH_1SDV_20210817T113623_20210817T113648_039269_04A2FD_234F | 20210817 |
| S1A_IW_GRDH_1SDV_20210819T111911_20210819T111936_039298_04A400_E116 | 20210819 |
| S1A_IW_GRDH_1SDV_20210819T111936_20210819T112001_039298_04A400_1357 | 20210819 |
| S1A_IW_GRDH_1SDV_20210819T112001_20210819T112026_039298_04A400_9D5A | 20210819 |
| S1A_IW_GRDH_1SDV_20210821T110235_20210821T110300_039327_04A4F5_9D8C | 20210821 |
| S1A_IW_GRDH_1SDV_20210821T110300_20210821T110325_039327_04A4F5_E6AD | 20210821 |
| S1A_IW_GRDH_1SDV_20210822T114408_20210822T114433_039342_04A57A_4101 | 20210822 |
| S1A_IW_GRDH_1SDV_20210824T112733_20210824T112758_039371_04A67D_A360 | 20210824 |
| S1A_IW_GRDH_1SDV_20210824T112758_20210824T112823_039371_04A67D_C637 | 20210824 |
| S1A_IW_GRDH_1SDV_20210826T111036_20210826T111101_039400_04A77B_71AD | 20210826 |
| S1A_IW_GRDH_1SDV_20210826T111101_20210826T111126_039400_04A77B_7C48 | 20210826 |
| S1A_IW_GRDH_1SDV_20210826T111126_20210826T111151_039400_04A77B_3CB8 | 20210826 |
| S1A_IW_GRDH_1SDV_20210829T113534_20210829T113559_039444_04A8F0_8C45 | 20210829 |
| S1A_IW_GRDH_1SDV_20210829T113559_20210829T113624_039444_04A8F0_C55D | 20210829 |
| S1A_IW_GRDH_1SDV_20210829T113624_20210829T113649_039444_04A8F0_15E7 | 20210829 |
| S1A_IW_GRDH_1SDV_20210831T111911_20210831T111936_039473_04A9FA_0D97 | 20210831 |
| S1A_IW_GRDH_1SDV_20210831T111936_20210831T112001_039473_04A9FA_59D6 | 20210831 |

|                                                                      |          |
|----------------------------------------------------------------------|----------|
| S1A_IW_GRDH_1SDV_20210831T112001_20210831T112026_039473_04A9FA_34CF  | 20210831 |
| S1A_IW_GRDH_1SDV_20210902T110236_20210902T110301_039502_04AAE_D_1488 | 20210902 |
| S1A_IW_GRDH_1SDV_20210902T110301_20210902T110326_039502_04AAE_D_08FE | 20210902 |
| S1A_IW_GRDH_1SDV_20210903T114409_20210903T114434_039517_04AB80_270D  | 20210903 |
| S1A_IW_GRDH_1SDV_20210905T112734_20210905T112759_039546_04AC83_0458  | 20210905 |
| S1A_IW_GRDH_1SDV_20210905T112759_20210905T112824_039546_04AC83_52F7  | 20210905 |
| S1A_IW_GRDH_1SDV_20210907T111037_20210907T111102_039575_04AD91_E4BD  | 20210907 |
| S1A_IW_GRDH_1SDV_20210907T111102_20210907T111127_039575_04AD91_EA18  | 20210907 |
| S1A_IW_GRDH_1SDV_20210907T111127_20210907T111152_039575_04AD91_CAD4  | 20210907 |
| S1A_IW_GRDH_1SDV_20210910T113534_20210910T113559_039619_04AF02_325F  | 20210910 |
| S1A_IW_GRDH_1SDV_20210910T113559_20210910T113624_039619_04AF02_DB65  | 20210910 |
| S1A_IW_GRDH_1SDV_20210910T113624_20210910T113649_039619_04AF02_DE01  | 20210910 |
| S1A_IW_GRDH_1SDV_20210912T111912_20210912T111937_039648_04B00C_91CB  | 20210912 |
| S1A_IW_GRDH_1SDV_20210912T111937_20210912T112002_039648_04B00C_40BA  | 20210912 |
| S1A_IW_GRDH_1SDV_20210912T112002_20210912T112027_039648_04B00C_EAC3  | 20210912 |
| S1A_IW_GRDH_1SDV_20210914T110236_20210914T110301_039677_04B102_644C  | 20210914 |
| S1A_IW_GRDH_1SDV_20210914T110301_20210914T110326_039677_04B102_2198  | 20210914 |
| S1A_IW_GRDH_1SDV_20210917T112734_20210917T112759_039721_04B27D_A489  | 20210917 |
| S1A_IW_GRDH_1SDV_20210917T112759_20210917T112824_039721_04B27D_1F77  | 20210917 |
| S1A_IW_GRDH_1SDV_20210919T111037_20210919T111102_039750_04B37E_B0FF  | 20210919 |
| S1A_IW_GRDH_1SDV_20210919T111102_20210919T111127_039750_04B37E_49C4  | 20210919 |
| S1A_IW_GRDH_1SDV_20210919T111127_20210919T111152_039750_04B37E_8774  | 20210919 |

|                                                                     |          |
|---------------------------------------------------------------------|----------|
| S1A_IW_GRDH_1SDV_20210922T113535_20210922T113600_039794_04B4ED_F0FA | 20210922 |
| S1A_IW_GRDH_1SDV_20210922T113600_20210922T113625_039794_04B4ED_2722 | 20210922 |
| S1A_IW_GRDH_1SDV_20210922T113625_20210922T113650_039794_04B4ED_B37D | 20210922 |
| S1A_IW_GRDH_1SDV_20210924T111912_20210924T111937_039823_04B5EC_AA7E | 20210924 |
| S1A_IW_GRDH_1SDV_20210924T111937_20210924T112002_039823_04B5EC_382E | 20210924 |
| S1A_IW_GRDH_1SDV_20210924T112002_20210924T112027_039823_04B5EC_BBE7 | 20210924 |
| S1A_IW_GRDH_1SDV_20210926T110237_20210926T110302_039852_04B6E5_DB32 | 20210926 |
| S1A_IW_GRDH_1SDV_20210926T110302_20210926T110327_039852_04B6E5_A01E | 20210926 |
| S1A_IW_GRDH_1SDV_20210927T114410_20210927T114435_039867_04B775_8B5F | 20210927 |
| S1A_IW_GRDH_1SDV_20210929T112735_20210929T112800_039896_04B880_416E | 20210929 |
| S1A_IW_GRDH_1SDV_20210929T112800_20210929T112824_039896_04B880_55D9 | 20210929 |
| S1A_IW_GRDH_1SDV_20211001T111038_20211001T111103_039925_04B983_1A18 | 20211001 |
| S1A_IW_GRDH_1SDV_20211001T111103_20211001T111128_039925_04B983_4A98 | 20211001 |
| S1A_IW_GRDH_1SDV_20211001T111128_20211001T111153_039925_04B983_AB33 | 20211001 |
| S1A_IW_GRDH_1SDV_20211004T113535_20211004T113600_039969_04BB05_34FB | 20211004 |
| S1A_IW_GRDH_1SDV_20211004T113600_20211004T113625_039969_04BB05_BD59 | 20211004 |
| S1A_IW_GRDH_1SDV_20211004T113625_20211004T113650_039969_04BB05_2D4F | 20211004 |
| S1A_IW_GRDH_1SDV_20211006T111913_20211006T111938_039998_04BC07_A9AD | 20211006 |
| S1A_IW_GRDH_1SDV_20211006T111938_20211006T112003_039998_04BC07_9445 | 20211006 |
| S1A_IW_GRDH_1SDV_20211006T112003_20211006T112028_039998_04BC07_562D | 20211006 |
| S1A_IW_GRDH_1SDV_20211008T110237_20211008T110302_040027_04BCF4_F35A | 20211008 |
| S1A_IW_GRDH_1SDV_20211008T110302_20211008T110327_040027_04BCF4_9128 | 20211008 |

|                                                                     |          |
|---------------------------------------------------------------------|----------|
| S1A_IW_GRDH_1SDV_20211009T114410_20211009T114435_040042_04BD80_D7C0 | 20211009 |
| S1A_IW_GRDH_1SDV_20211011T112735_20211011T112800_040071_04BE86_716A | 20211011 |
| S1A_IW_GRDH_1SDV_20211011T112800_20211011T112825_040071_04BE86_2214 | 20211011 |
| S1A_IW_GRDH_1SDV_20211013T111038_20211013T111103_040100_04BF97_E648 | 20211013 |
| S1A_IW_GRDH_1SDV_20211013T111103_20211013T111128_040100_04BF97_B4BF | 20211013 |
| S1A_IW_GRDH_1SDV_20211013T111128_20211013T111153_040100_04BF97_2E3F | 20211013 |
| S1A_IW_GRDH_1SDV_20211016T113535_20211016T113600_040144_04C111_BC9B | 20211016 |
| S1A_IW_GRDH_1SDV_20211016T113600_20211016T113625_040144_04C111_00F9 | 20211016 |
| S1A_IW_GRDH_1SDV_20211016T113625_20211016T113650_040144_04C111_CA5B | 20211016 |
| S1A_IW_GRDH_1SDV_20211018T111913_20211018T111938_040173_04C21B_28AB | 20211018 |
| S1A_IW_GRDH_1SDV_20211018T111938_20211018T112003_040173_04C21B_E11F | 20211018 |
| S1A_IW_GRDH_1SDV_20211018T112003_20211018T112028_040173_04C21B_05DA | 20211018 |
| S1A_IW_GRDH_1SDV_20211020T110237_20211020T110302_040202_04C30F_294E | 20211020 |
| S1A_IW_GRDH_1SDV_20211020T110302_20211020T110327_040202_04C30F_661D | 20211020 |
| S1A_IW_GRDH_1SDV_20211021T114410_20211021T114435_040217_04C394_2C91 | 20211021 |
| S1A_IW_GRDH_1SDV_20211023T112735_20211023T112800_040246_04C4A0_EAEB | 20211023 |
| S1A_IW_GRDH_1SDV_20211023T112800_20211023T112825_040246_04C4A0_E5D6 | 20211023 |
| S1A_IW_GRDH_1SDV_20211025T111038_20211025T111103_040275_04C5AC_7F7F | 20211025 |
| S1A_IW_GRDH_1SDV_20211025T111103_20211025T111128_040275_04C5AC_8D05 | 20211025 |
| S1A_IW_GRDH_1SDV_20211025T111128_20211025T111153_040275_04C5AC_AA94 | 20211025 |
| S1A_IW_GRDH_1SDV_20211028T113535_20211028T113600_040319_04C725_7F02 | 20211028 |
| S1A_IW_GRDH_1SDV_20211028T113600_20211028T113625_040319_04C725_D227 | 20211028 |

|                                                                     |          |
|---------------------------------------------------------------------|----------|
| S1A_IW_GRDH_1SDV_20211028T113625_20211028T113650_040319_04C725_1751 | 20211028 |
| S1A_IW_GRDH_1SDV_20211030T111913_20211030T111938_040348_04C82F_BBC8 | 20211030 |
| S1A_IW_GRDH_1SDV_20211030T111938_20211030T112003_040348_04C82F_B1EF | 20211030 |
| S1A_IW_GRDH_1SDV_20211030T112003_20211030T112028_040348_04C82F_02FE | 20211030 |
| S1A_IW_GRDH_1SDV_20211101T110237_20211101T110302_040377_04C91D_D07A | 20211101 |
| S1A_IW_GRDH_1SDV_20211101T110302_20211101T110327_040377_04C91D_ACC9 | 20211101 |
| S1A_IW_GRDH_1SDV_20211102T114410_20211102T114435_040392_04C9AF_8C9F | 20211102 |
| S1A_IW_GRDH_1SDV_20211104T112734_20211104T112759_040421_04CAB8_5A69 | 20211104 |
| S1A_IW_GRDH_1SDV_20211104T112759_20211104T112824_040421_04CAB8_AC9D | 20211104 |
| S1A_IW_GRDH_1SDV_20211106T111037_20211106T111102_040450_04CBC9_D170 | 20211106 |
| S1A_IW_GRDH_1SDV_20211109T113535_20211109T113600_040494_04CD49_0F99 | 20211109 |
| S1A_IW_GRDH_1SDV_20211109T113600_20211109T113625_040494_04CD49_9A39 | 20211109 |
| S1A_IW_GRDH_1SDV_20211109T113625_20211109T113650_040494_04CD49_2C5F | 20211109 |
| S1A_IW_GRDH_1SDV_20211111T111912_20211111T111937_040523_04CE46_0A66 | 20211111 |
| S1A_IW_GRDH_1SDV_20211111T111937_20211111T112002_040523_04CE46_A06D | 20211111 |
| S1A_IW_GRDH_1SDV_20211111T112002_20211111T112027_040523_04CE46_B256 | 20211111 |
| S1A_IW_GRDH_1SDV_20211113T110237_20211113T110302_040552_04CF38_1952 | 20211113 |
| S1A_IW_GRDH_1SDV_20211113T110302_20211113T110327_040552_04CF38_E6BF | 20211113 |
| S1A_IW_GRDH_1SDV_20211114T114410_20211114T114435_040567_04CFCE_6087 | 20211114 |
| S1A_IW_GRDH_1SDV_20211118T111037_20211118T111102_040625_04D1CE_AC04 | 20211118 |
| S1A_IW_GRDH_1SDV_20211118T111102_20211118T111127_040625_04D1CE_C62C | 20211118 |
| S1A_IW_GRDH_1SDV_20211118T111127_20211118T111152_040625_04D1CE_A910 | 20211118 |



|                                                                     |          |
|---------------------------------------------------------------------|----------|
| S1A_IW_GRDH_1SDV_20211121T113535_20211121T113600_040669_04D34C_903F | 20211121 |
| S1A_IW_GRDH_1SDV_20211121T113600_20211121T113625_040669_04D34C_C226 | 20211121 |
| S1A_IW_GRDH_1SDV_20211121T113625_20211121T113650_040669_04D34C_2A44 | 20211121 |
| S1A_IW_GRDH_1SDV_20211123T111912_20211123T111937_040698_04D451_29DA | 20211123 |
| S1A_IW_GRDH_1SDV_20211123T111937_20211123T112002_040698_04D451_989B | 20211123 |
| S1A_IW_GRDH_1SDV_20211123T112002_20211123T112027_040698_04D451_CC3C | 20211123 |
| S1A_IW_GRDH_1SDV_20211125T110236_20211125T110301_040727_04D544_A0C2 | 20211125 |
| S1A_IW_GRDH_1SDV_20211125T110301_20211125T110326_040727_04D544_4AD3 | 20211125 |
| S1A_IW_GRDH_1SDV_20211126T114409_20211126T114434_040742_04D5CF_C964 | 20211126 |
| S1A_IW_GRDH_1SDV_20211128T112734_20211128T112759_040771_04D6D7_7B6A | 20211128 |
| S1A_IW_GRDH_1SDV_20211128T112759_20211128T112824_040771_04D6D7_9693 | 20211128 |
| S1A_IW_GRDH_1SDV_20211130T111037_20211130T111102_040800_04D7E7_BD63 | 20211130 |
| S1A_IW_GRDH_1SDV_20211130T111102_20211130T111127_040800_04D7E7_D6A7 | 20211130 |
| S1A_IW_GRDH_1SDV_20211130T111127_20211130T111152_040800_04D7E7_C952 | 20211130 |
| S1A_IW_GRDH_1SDV_20211203T113534_20211203T113559_040844_04D966_C153 | 20211203 |
| S1A_IW_GRDH_1SDV_20211203T113559_20211203T113624_040844_04D966_C063 | 20211203 |
| S1A_IW_GRDH_1SDV_20211203T113624_20211203T113649_040844_04D966_BCB7 | 20211203 |
| S1A_IW_GRDH_1SDV_20211205T111912_20211205T111937_040873_04DA6E_B771 | 20211205 |
| S1A_IW_GRDH_1SDV_20211205T111937_20211205T112002_040873_04DA6E_D4A1 | 20211205 |
| S1A_IW_GRDH_1SDV_20211205T112002_20211205T112027_040873_04DA6E_8EDE | 20211205 |
| S1A_IW_GRDH_1SDV_20211207T110236_20211207T110301_040902_04DB5E_EFF1 | 20211207 |
| S1A_IW_GRDH_1SDV_20211207T110301_20211207T110326_040902_04DB5E_20D6 | 20211207 |

|                                                                     |          |
|---------------------------------------------------------------------|----------|
| S1A_IW_GRDH_1SDV_20211208T114409_20211208T114434_040917_04DBE8_D475 | 20211208 |
| S1A_IW_GRDH_1SDV_20211210T112733_20211210T112758_040946_04DCE7_289B | 20211210 |
| S1A_IW_GRDH_1SDV_20211210T112758_20211210T112823_040946_04DCE7_41A7 | 20211210 |
| S1A_IW_GRDH_1SDV_20211212T111036_20211212T111101_040975_04DDF6_0A56 | 20211212 |
| S1A_IW_GRDH_1SDV_20211212T111101_20211212T111126_040975_04DDF6_F3D7 | 20211212 |
| S1A_IW_GRDH_1SDV_20211212T111126_20211212T111151_040975_04DDF6_A1E9 | 20211212 |
| S1A_IW_GRDH_1SDV_20211215T113534_20211215T113559_041019_04DF66_AC31 | 20211215 |
| S1A_IW_GRDH_1SDV_20211215T113559_20211215T113624_041019_04DF66_237E | 20211215 |
| S1A_IW_GRDH_1SDV_20211215T113624_20211215T113649_041019_04DF66_2EF7 | 20211215 |
| S1A_IW_GRDH_1SDV_20211217T111911_20211217T111936_041048_04E05F_C025 | 20211217 |
| S1A_IW_GRDH_1SDV_20211217T111936_20211217T112001_041048_04E05F_B277 | 20211217 |
| S1A_IW_GRDH_1SDV_20211217T112001_20211217T112026_041048_04E05F_AFB1 | 20211217 |
| S1A_IW_GRDH_1SDV_20211219T110235_20211219T110300_041077_04E146_2114 | 20211219 |
| S1A_IW_GRDH_1SDV_20211219T110300_20211219T110325_041077_04E146_71AB | 20211219 |
| S1A_IW_GRDH_1SDV_20211220T114408_20211220T114433_041092_04E1BD_0A4A | 20211220 |
| S1A_IW_GRDH_1SDV_20211222T112733_20211222T112758_041121_04E2C3_C41B | 20211222 |
| S1A_IW_GRDH_1SDV_20211222T112758_20211222T112823_041121_04E2C3_D7F0 | 20211222 |
| S1A_IW_GRDH_1SDV_20211224T111036_20211224T111101_041150_04E3B8_E982 | 20211224 |
| S1A_IW_GRDH_1SDV_20211224T111101_20211224T111126_041150_04E3B8_DAEB | 20211224 |
| S1A_IW_GRDH_1SDV_20211224T111126_20211224T111151_041150_04E3B8_C5ED | 20211224 |
| S1A_IW_GRDH_1SDV_20211227T113533_20211227T113558_041194_04E525_95BB | 20211227 |
| S1A_IW_GRDH_1SDV_20211227T113558_20211227T113623_041194_04E525_C513 | 20211227 |

|                                                                 |         |
|-----------------------------------------------------------------|---------|
| S1A_IW_GRDH_1SDV_20211227T113623_20211227T113648_041194_04E525_ | 2021122 |
| CD06                                                            | 7       |
| S1A_IW_GRDH_1SDV_20211229T111910_20211229T111935_041223_04E630_ | 2021122 |
| 1C3B                                                            | 9       |
| S1A_IW_GRDH_1SDV_20211229T111935_20211229T112000_041223_04E630_ | 2021122 |
| 4234                                                            | 9       |
| S1A_IW_GRDH_1SDV_20211229T112000_20211229T112025_041223_04E630_ | 2021122 |
| C74B                                                            | 9       |
